# Supplementary material for: Effect of Interactions between Phosphorus and Light Intensity on Metabolite Compositions in Tea Cultivar Longjing43
Source: MDPI journal article supplement (doi:10.3390/ijms232315194), 2022-12-02
Supplement: s1 [file s1]

Table S1. Primer sequences for Longjing-43 cultivar for qRT-PCR analysis.

| Pathway                                                                | Gene Identifier | Forward primer (5'>3')  | Reverse primer (5'>3')    | References         |
|------------------------------------------------------------------------|-----------------|-------------------------|---------------------------|--------------------|
| <i>PHR1</i><br>( <i>phospahte starvation response 1</i> )              | CL15435Contig1  | ATCTGCACAATGAACAGCACCAT | GCTCCAAAGAGGCTTAGGATAGA   | KC et al. (2018)   |
| <i>PHO1</i><br>( <i>phosphate signal transduction 1</i> )              | CL27009Contig1  | TCGAGTCCTGGTAGGAAGAACCT | GTTGATTATTGGCAACTCAAGAAAG | KC et al. (2018)   |
| <i>SPX2</i><br>( <i>Pi transport, stress, sensing and signalling</i> ) | CL117Contig2    | CAGGGTAGCAGAGGCTCGGGATT | AGCACCGCTTCGCTTGTCGTATT   | KC et al. (2018)   |
| <i>SWEET3</i><br>( <i>bidirectional sugar transporter</i> )            | CL73507Contig1  | GGCTGCCAACCAGATTAGGA    | TCCTCTGGTGGTCGTGAAGA      |                    |
| <i>AAP</i><br>( <i>amino acid permeases</i> )                          | CL10295Contig1  | TTGAGTCTCAGTCACCGTGC    | TCGGTCTTGGAATCGGCAAA      |                    |
| <i>GSTb</i><br>( <i>glutathione S-transferase b</i> )                  | CL12598Contig1  | AGTGGTCGGTTGGATCCCTA    | ATGGAGGCAAGGGAAGTTCTG     |                    |
| <i>Actin</i>                                                           |                 | AGAAGTCCTGTTCCAGCCGTCTT | CGAACCACCACTGAGCACTATGTT  | Li et al. (2016)   |
| <i>GAPDH</i>                                                           |                 | GTGGTTCTTGTGAGTTTCTGGA  | ACCCTTCTCTTCAAGGGCAAT     | Xiong et al (2013) |

**References**

KC, S.; Liu, M.; Zhang, Q.; Fan, K.; Shi, Y.; Ruan, J. Metabolic Changes of Amino Acids and Flavonoids in Tea Plants in Response to Inorganic Phosphate Limitation. *Int. J. Mol. Sci.* 2018, 19, 3683. <https://doi.org/10.3390/ijms19113683>

Li et al. (2016) Li MY, Wang F, Jiang Q, Wang GL, Tian C, Xiong AS. Validation and comparison of reference genes for qPCR normalization of celery (*Apium graveolens*) at different development stages. *Frontiers in Plant Science.* 2016b;7:313. doi: 10.3389/fpls.2016.00313.

Xiong, L., Li, J., Li, Y., Yuan, L., Liu, S., Huang, J., Liu, Z. Dynamic changes in catechin levels and catechin biosynthesis-related gene expression in albino tea plants (*Camellia sinensis* L.). *Plant Physiology and Biochemistry*, 2013, 71: 132-143.

Table S2. Primary metabolites related gene transcripts primer sequences for the of Longjing-43 cultivar of selected pathways for qRT-PCR analysis.

| Pathway                                            | Gene, reaction and Enzymatic activity                                       | Gene Identifier | Forward primer (5'>3')  | Reverse primer (5'>3')  | References       |
|----------------------------------------------------|-----------------------------------------------------------------------------|-----------------|-------------------------|-------------------------|------------------|
| Fructose and Mannose metabolism                    | <i>hexokinase 1</i><br>(2.7.1.1, <i>HK1</i> )                               | CL42645Contig1  | CCCGTGTGCGCAACTATGTCA   | CGGCTCTCTTCGGTGAAACT    | KC et al. (2018) |
| Inositol phosphate metabolism                      | <i>inositol-phosphate phosphatase 1</i><br>(3.1.3.25, <i>IMPL1</i> )        | CL37584Contig1  | TCGATTTTCGGGTGTCTTGTAGG | TGATGACATGGTCGCATCCAA   | KC et al. (2018) |
| Pentose phosphate pathway                          | <i>ribose 5-phosphate isomerase A</i><br>(5.3.1.6, <i>R5PIA</i> )           | CL76822Contig1  | GACTCGGAGTGATGGCAAGT    | AATGGTAGGCACATGGAGGC    | KC et al. (2018) |
|                                                    | <i>ribokinase synthase</i><br>(2.7.1.15, <i>RBKS</i> )                      | CL66999Contig1  | ACAACCCCACAACCCTCAAG    | AGACTGGCCAAACACTTGCT    | KC et al. (2018) |
| Pentose and Glucuronate Interconversions           | <i>xylose isomerase</i><br>(5.3.1.5, <i>XylA</i> )                          | CL2313Contig1   | GTCGGATTGGCTTCGCTTTG    | AGGATTAGTAGCAGCACCGC    | KC et al. (2018) |
|                                                    | <i>D-xylose reductase</i><br>(1.1.1.15, <i>XR</i> )                         | CL23910Contig1  | CCGATAGACTTCACCAGCCC    | TCACGTTCCGATTGAAGCGA    | KC et al. (2018) |
| Phenylalanine,Tyrosine and Tryptophan biosynthesis | <i>arogenate/ prephenate dehydrase</i><br>(4.2.1.51/4.2.1.91, <i>ADT1</i> ) | CL9637Contig1   | CAACTGGTCGTTTGTCCGTAATG | CTTGCTCAGACTTCCTAAGAGGC | KC et al. (2018) |
| Alanine, Asparate and Glutamate Metabolism         | <i>glutamine synthetase 1</i><br>(6.3.1.2, <i>GS1</i> )                     | CL66758Contig1  | TCCAAGCTTTTCGATGGCCT    | GTGGAGAGCCAATCCCAACA    | KC et al. (2018) |
| Kerb's cycle                                       | <i>isocitrate dehydrogenase</i><br>(1.1.1.42, <i>IDH</i> )                  | CL31117Contig1  | TACGCGTGCCTAATCAGGAG    | AGGTGTTGAACCCAGTGGTG    | KC et al. (2018) |
|                                                    | <i>Succinate dehydrogenase 4</i><br>(1.3.5.1, <i>SDH4</i> )                 | CL33432Contig1  | CCTACGACAACCGCATCGT     | CCCCACATTCGAAGACCCTT    | KC et al. (2018) |
| Arginine and Proline biosynthesis                  | <i>prolyl 4-hydroxylase</i><br>(1.14.11.2, <i>P4H</i> )                     | CL27105Contig1  | CGTCGCCTTTCTTCGGTTTC    | TCTGATGTGACCAAAGGCGG    | KC et al. (2018) |

Continue on the next page

Table S2. Primary metabolites related gene transcripts primer sequences for the of Longjing-43 cultivar of selected pathways for qRT-PCR analysis (*cont.*).

| Pathway                                     | Gene, reaction and Enzymatic activity                                                | Gene Identifier | Forward primer (5'>3') | Reverse primer (5'>3') | References       |
|---------------------------------------------|--------------------------------------------------------------------------------------|-----------------|------------------------|------------------------|------------------|
| Isoavone Biosynthesis                       | <i>arginase</i><br>(3.5.3.1, <i>arg</i> )                                            | CL40328Contig1  | CCGCTCTCTTCATCAGCTCC   | ACCTCCTAAAGCACGCACAA   | KC et al. (2018) |
|                                             | <i>flavonol 3-O glycosyltransferase</i><br>(2.4.1.91, <i>UGT78D2</i> )               | CL89596Contig1  | CAGGGATGGAACATGTCGCT   | AAATTACCCACCGCCGAGTT   | KC et al. (2018) |
|                                             | <i>flavonol-3-O-glucoside L-rhamnosyltransferase</i><br>(2.4.1.159, <i>UGT78D1</i> ) | CL25776Contig1  | AACCATGGGTCCCAATAGCG   | ACAGAATAACTCGCCGCACA   | KC et al. (2018) |
| Flavanones Biosynthesis                     | <i>flavonoid 3',5'-hydroxylase</i><br>(1.14.14.81, <i>F3' 5' H</i> )                 | CL54192Contig1  | CATCTCCGCTAGTGCCCATT   | ATGATGAGAGGCTCAGCGTG   | KC et al. (2018) |
| Anthocyanidins Biosynthesis                 | <i>leucoanthocyanidin reductase</i><br>(1.17.1.3, <i>LAR</i> )                       | CL77394Contig1  | CTGCAGCAAGGAGGTCATCT   | TCAGGGGTGCCCTACACTTA   | KC et al. (2018) |
|                                             | <i>anthocyanidin 3-O-glucosyltransferase</i><br>(2.4.1.115, <i>UFGT</i> )            | CL89161Contig1  | CATAGGCTCCCGAAGCAGAG   | GAATCACCGCCAGTTTACGC   | KC et al. (2018) |
| Flavones Biosynthesis                       | <i>glucosyltransferases</i><br>(2.1.4.81, <i>UGT75L12</i> )                          | CL90073Contig1  | AGTTCTTTTCGCACCCGTCAT  | TCTTCCACCAGCTTCGCATT   | KC et al. (2018) |
| Anthocyanin and Anthocyanidins Biosynthesis | <i>leucoanthocyanidin dioxygenase</i><br>(1.4.11.19, <i>LDOX</i> )                   | CL59191Contig1  | CAACCGGCTTCCATACCCTT   | TTGGCGATGACAGTGCTCTT   | KC et al. (2018) |
|                                             | <i>anthocyanidin reductase</i><br>(1.3.1.77, <i>ANR</i> )                            | CL2560Contig1   | ACTTGTTGTTGTTGGCGATCC  | ACAAGGCTAGGGCTAAAGCA   | KC et al. (2018) |

References

KC, S.; Liu, M.; Zhang, Q.; Fan, K.; Shi, Y.; Ruan, J. Metabolic Changes of Amino Acids and Flavonoids in Tea Plants in Response to Inorganic Phosphate Limitation. *Int. J. Mol. Sci.* 2018, 19, 3683. <https://doi.org/10.3390/ijms19113683>

Table S3. Secondary metabolites related gene transcripts primer sequences for the of Longjing-43 cultivar of selected pathways for qRT-PCR analysis.

| Pathway                                    | Gene, reaction and Enzymatic activity                                                | Gene Identifier | Forward primer (5'>3') | Reverse primer (5'>3') | References       |
|--------------------------------------------|--------------------------------------------------------------------------------------|-----------------|------------------------|------------------------|------------------|
| Isoflavone Biosynthesis                    | <i>flavonol 3-O glycosyltransferase</i><br>(2.4.1.91, <i>UGT78D2</i> )               | CL89596Contig1  | CAGGGATGGAACATGTCTGCT  | AAATTACCCACCGCCGAGTT   | KC et al. (2018) |
|                                            | <i>flavonol-3-O-glucoside L-rhamnosyltransferase</i><br>(2.4.1.159, <i>UGT78D1</i> ) | CL25776Contig1  | AACCATGGGTCCCAATAGCG   | ACAGAATAACTCGCCGCACA   | KC et al. (2018) |
| Anthocyanidin and Anthocyanin Biosynthesis | <i>anthocyanidin reductase</i><br>(1.3.1.77, <i>ANR</i> )                            | CL2560Contig1   | ACTTGTGTTGTTGGCGATCC   | ACAAGGCTAGGGCTAAAGCA   | KC et al. (2018) |
|                                            | <i>flavonol synthase</i><br>(1.14.20.6, <i>FLS</i> )                                 | CL18757Contig1  | CTCGTTGATCGGACGGCTAA   | ACGACAAACACAGCCCAAGA   |                  |
|                                            | <i>leucoanthocyanidin dioxygenase</i><br>(1.4.11.19, <i>LDOX</i> )                   | CL59191Contig1  | CAACCGGCTTCCATACCCTT   | TTGGCGATGACAGTGCTCTT   | KC et al. (2018) |
|                                            | <i>flavonoid 3',5'-hydroxylase</i><br>(1.14.14.81, <i>F3' 5' H</i> )                 | CL54192Contig1  | CATCTCCGCTAGTGCCCAT    | ATGATGAGAGGCTCAGCGTG   | KC et al. (2018) |
|                                            | <i>leucoanthocyanidin reductase</i><br>(1.17.1.3, <i>LAR</i> )                       | CL77394Contig1  | CTGCAGCAAGGAGGTCATCT   | TCAGGGGTGCCCTACACTTA   | KC et al. (2018) |
|                                            | <i>anthocyanidin 3-O-glucosyltransferase</i><br>(2.4.1.115, <i>UFGT</i> )            | CL89161Contig1  | CATAGGCTCCCGAAGCAGAG   | GAATCACCGCCAGTTTACGC   | KC et al. (2018) |
| Flavones Biosynthesis                      | <i>glucosyltransferases</i><br>(2.1.4.81, <i>UGT75L12</i> )                          | CL90073Contig1  | AGTTCTTTTCGCACCCGTCAT  | TCTTCCACCAGCTTCGCATT   | KC et al. (2018) |

References

KC, S.; Liu, M.; Zhang, Q.; Fan, K.; Shi, Y.; Ruan, J. Metabolic Changes of Amino Acids and Flavonoids in Tea Plants in Response to Inorganic Phosphate Limitation. Int. J. Mol. Sci. 2018, 19, 3683. <https://doi.org/10.3390/ijms19113683>

Table S4. Concentrations of macro-elements (K, Mg, Ca, S, and Al, mg g<sup>-1</sup>) and micronutrients (Zn, Mn, Cu, Fe, B, mg kg<sup>-1</sup>) in young shoots under different light intensity and P levels.

| Nutrition | P level | Light Intensity |                 |                 | Significance     |                  |                  |
|-----------|---------|-----------------|-----------------|-----------------|------------------|------------------|------------------|
|           |         | FL              | ML              | LL              | light            | Plevel           | L×P              |
| K         | +P      | 23.32 ± 0.69a   | 20.36 ± 0.36c   | 15.62 ± 0.56d   | <i>p</i> < 0.001 | <i>p</i> < 0.001 | <i>p</i> < 0.001 |
|           | -P      | 21.96 ± 0.52b   | 15.76 ± 0.44d   | 14.16 ± 0.68e   |                  |                  |                  |
| S         | +P      | 2.35 ± 0.27b    | 1.84 ± 0.29bc   | 1.63 ± 0.26c    | <i>p</i> < 0.001 | <i>p</i> < 0.001 | <i>p</i> < 0.001 |
|           | -P      | 3.76 ± 0.34a    | 2.16 ± 0.27b    | 1.64 ± 0.3c     |                  |                  |                  |
| Ca        | +P      | 3.27 ± 0.3a     | 1.66 ± 0.21bc   | 1.69 ± 0.34bc   | <i>p</i> < 0.001 | <i>p</i> < 0.001 | <i>p</i> < 0.001 |
|           | -P      | 2.08 ± 0.31b    | 1.71 ± 0.24b    | 1.17 ± 0.36c    |                  |                  |                  |
| Al        | +P      | 0.77 ± 0.05a    | 0.74 ± 0.02ab   | 0.68 ± 0.08bc   | <i>p</i> < 0.001 | <i>p</i> < 0.05  | <i>p</i> < 0.05  |
|           | -P      | 0.8 ± 0.01a     | 0.69 ± 0.02b    | 0.62 ± 0.03c    |                  |                  |                  |
| Mg        | +P      | 0.91 ± 0.37b    | 0.96 ± 0.26b    | 1.98 ± 0.18a    | <i>p</i> < 0.001 | <i>p</i> < 0.05  | <i>p</i> < 0.001 |
|           | -P      | 0.95 ± 0.39b    | 1.11 ± 0.33b    | 1.11 ± 0.26b    |                  |                  |                  |
| Fe        | +P      | 137.1 ± 2.39a   | 113.29 ± 2.42c  | 111.79 ± 2.12c  | <i>p</i> < 0.001 | <i>p</i> < 0.001 | <i>p</i> < 0.001 |
|           | -P      | 131.7 ± 1.14b   | 114.62 ± 2.71c  | 86.21 ± 0.74d   |                  |                  |                  |
| B         | +P      | 30.56 ± 2.31a   | 27.22 ± 1.53b   | 22.76 ± 0.89c   | <i>p</i> < 0.001 | <i>p</i> < 0.001 | ns               |
|           | -P      | 29.55 ± 1.2ab   | 23.48 ± 0.57c   | 21.12 ± 0.97c   |                  |                  |                  |
| Cu        | +P      | 29.54 ± 0.4a    | 19.65 ± 0.45c   | 19.42 ± 0.24c   | <i>p</i> < 0.001 | <i>p</i> < 0.001 | <i>p</i> < 0.001 |
|           | -P      | 21.73 ± 0.86b   | 19.49 ± 0.29c   | 19.54 ± 0.19c   |                  |                  |                  |
| Zn        | +P      | 38.46 ± 1.12c   | 43.01 ± 0.35b   | 47.11 ± 0.6a    | <i>p</i> < 0.001 | <i>p</i> < 0.001 | <i>p</i> < 0.01  |
|           | -P      | 35.2 ± 0.51d    | 42.06 ± 0.44b   | 47.03 ± 0.56a   |                  |                  |                  |
| Mn        | +P      | 798.59 ± 54.15a | 754.57 ± 52.49a | 404.8 ± 88.77c  | <i>p</i> < 0.001 | <i>p</i> < 0.001 | <i>p</i> < 0.01  |
|           | -P      | 751.74 ± 82.45a | 545.36 ± 60.1b  | 357.32 ± 67.85c |                  |                  |                  |

Table S5. Concentrations of macro-elements (K, Mg, Ca, S, and Al, mg g<sup>-1</sup>) and micronutrients (Zn, Mn, Cu, Fe, B, mg kg<sup>-1</sup>) in leaves under different light intensity and P levels.

| Nutrition | P level | Light Intensity  |                |                  | Significance     |                  |                  |
|-----------|---------|------------------|----------------|------------------|------------------|------------------|------------------|
|           |         | FL               | ML             | LL               | light            | Plevel           | L×P              |
| K         | +P      | 22.49 ± 1.41a    | 18.97 ± 0.64c  | 21.05 ± 0.73abc  | <i>p</i> < 0.001 | <i>p</i> < 0.001 | <i>p</i> < 0.01  |
|           | -P      | 21.45 ± 2.43ab   | 14.07 ± 0.88d  | 19.18 ± 0.98bc   |                  |                  |                  |
| S         | +P      | 1.41 ± 0.23b     | 2.49 ± 0.91a   | 2.29 ± 0.25ab    | <i>p</i> < 0.001 | ns               | ns               |
|           | -P      | 1.58 ± 0.82ab    | 2.52 ± 0.21a   | 2.22 ± 0.36ab    |                  |                  |                  |
| Ca        | +P      | 4.29 ± 0.25a     | 1.66 ± 0.31c   | 4.09 ± 0.3a      | <i>p</i> < 0.001 | <i>p</i> < 0.001 | <i>p</i> < 0.001 |
|           | -P      | 4.23 ± 0.32a     | 1.54 ± 0.4c    | 2.61 ± 0.23b     |                  |                  |                  |
| Al        | +P      | 0.41 ± 0.03a     | 0.2 ± 0.03c    | 0.36 ± 0.03a     | <i>p</i> < 0.001 | <i>p</i> < 0.001 | ns               |
|           | -P      | 0.39 ± 0.03a     | 0.15 ± 0.04d   | 0.29 ± 0.03b     |                  |                  |                  |
| Mg        | +P      | 0.73 ± 0.03c     | 0.88 ± 0.03b   | 0.84 ± 0.03b     | <i>p</i> < 0.001 | <i>p</i> < 0.001 | <i>p</i> < 0.001 |
|           | -P      | 0.88 ± 0.04b     | 0.86 ± 0.02b   | 0.98 ± 0.03a     |                  |                  |                  |
| Fe        | +P      | 133.9 ± 7.67a    | 95.75 ± 10.96c | 133.52 ± 2.89a   | <i>p</i> < 0.001 | <i>p</i> < 0.001 | <i>p</i> < 0.01  |
|           | -P      | 125.75 ± 13.28ab | 60.75 ± 9.07d  | 112.44 ± 10.96bc |                  |                  |                  |
| B         | +P      | 35.36 ± 0.61a    | 18.65 ± 0.36e  | 21.9 ± 0.29c     | <i>p</i> < 0.001 | <i>p</i> < 0.001 | <i>p</i> < 0.001 |
|           | -P      | 24.3 ± 0.78b     | 14.89 ± 0.21f  | 20.42 ± 1.57d    |                  |                  |                  |
| Cu        | +P      | 21.92 ± 0.44a    | 14.91 ± 1.06d  | 20.54 ± 0.8b     | <i>p</i> < 0.001 | <i>p</i> < 0.05  | <i>p</i> < 0.05  |
|           | -P      | 21.9 ± 1.08a     | 14.51 ± 0.21d  | 18.96 ± 0.24c    |                  |                  |                  |
| Zn        | +P      | 28.02 ± 1.43a    | 16.63 ± 0.57e  | 20.21 ± 0.33c    | <i>p</i> < 0.001 | <i>p</i> < 0.001 | <i>p</i> < 0.001 |
|           | -P      | 22.67 ± 0.53b    | 13.59 ± 0.27f  | 18.33 ± 0.35d    |                  |                  |                  |
| Mn        | +P      | 349.22 ± 5.44e   | 502.4 ± 16.21a | 404.04 ± 9.6c    | <i>p</i> < 0.001 | <i>p</i> < 0.001 | ns               |
|           | -P      | 310.1 ± 6.11f    | 462.72 ± 4.87b | 367.6 ± 3.08d    |                  |                  |                  |

Table S6. Light intensity and P interaction effect on Primary metabolites and/or related anaplerotic pathway metabolites to carbohydrates and amino acids of Longjing-43 cultivar measured by GC×GC-TOF/MS analysis (Data normalise to 1 based on treatment (FL+P)).

| Metabolites        | Chemical Structure                                                                   | Mass | 1st Dim<br>Time<br>(Minutes) | 2nd Dim<br>Time<br>(Seconds) | CAS        | Organ  | P level | Light Intensity    |                      |                   | Significance |     |     |
|--------------------|--------------------------------------------------------------------------------------|------|------------------------------|------------------------------|------------|--------|---------|--------------------|----------------------|-------------------|--------------|-----|-----|
|                    |                                                                                      |      |                              |                              |            |        |         | Full<br>Light (FL) | Medium<br>Light (ML) | Low<br>Light (LL) | FL           | ML  | LL  |
| 1D-myo-inositol-3P | 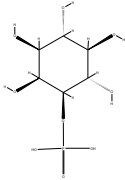   | 29   | 2.33                         | 7.3                          | 2831-74-5  | YS     | +P      | 1 ± 0.09b          | 0.55 ± 0.04d         | 0.79 ± 0.05c      | ***          | *** | *** |
|                    |                                                                                      |      |                              |                              |            |        | -P      | 1.1 ± 0.04b        | 2.06 ± 0.21a         | 0.97 ± 0.05b      |              |     |     |
|                    |                                                                                      |      |                              |                              |            | Leaves | +P      | 1 ± 0.95d          | 1.74 ± 0.08d         | 3.8 ± 0.49c       | ***          | *** | *** |
|                    |                                                                                      |      |                              |                              |            |        | -P      | 6.95 ± 0.31b       | 9.42 ± 0.55a         | 0.92 ± 0.47d      |              |     |     |
|                    |                                                                                      |      |                              |                              |            | Roots  | +P      | 1 ± 0.1b           | 0.54 ± 0.01d         | 0.64 ± 0.02cd     | ***          | *** | **  |
|                    |                                                                                      |      |                              |                              |            |        | -P      | 1.36 ± 0.2a        | 0.62 ± 0.01d         | 0.79 ± 0.01c      |              |     |     |
| 1D-myo-inositol-1P |    | 259  | 33.5                         | 1.86                         | 15421-51-9 | YS     | +P      | 1 ± 0.09b          | 0.52 ± 0.04d         | 0.76 ± 0.05c      | ***          | *** | *** |
|                    |                                                                                      |      |                              |                              |            |        | -P      | 1.09 ± 0.04b       | 2.05 ± 0.21a         | 0.96 ± 0.05b      |              |     |     |
|                    |                                                                                      |      |                              |                              |            | Leaves | +P      | 1 ± 0.42d          | 2.45 ± 0.06b         | 1.23 ± 0.06d      | ***          | *** | *** |
|                    |                                                                                      |      |                              |                              |            |        | -P      | 1.81 ± 0.14c       | 3.4 ± 0.12a          | 1.17 ± 0.13d      |              |     |     |
|                    |                                                                                      |      |                              |                              |            | Roots  | +P      | 1 ± 0.04ab         | 1.1 ± 0.01a          | 0.97 ± 0.03b      | **           | *** | ns  |
|                    |                                                                                      |      |                              |                              |            |        | -P      | 0.76 ± 0.12c       | 0.88 ± 0.08bc        | 0.81 ± 0.12c      |              |     |     |
| myo-inositol       |   | 44   | 37.2                         | 1.4                          | 87-89-8    | YS     | +P      | 1 ± 0.03c          | 1.53 ± 0.03a         | 1.08 ± 0.03b      | ***          | *** | *** |
|                    |                                                                                      |      |                              |                              |            |        | -P      | 0.83 ± 0.01d       | 1.49 ± 0.1a          | 0.84 ± 0.01d      |              |     |     |
|                    |                                                                                      |      |                              |                              |            | Leaves | +P      | 1 ± 0.64c          | 0.95 ± 0.06c         | 1.48 ± 0.07ab     | **           | *** | ns  |
|                    |                                                                                      |      |                              |                              |            |        | -P      | 1.52 ± 0.04a       | 1.74 ± 0.05a         | 1.04 ± 0.15bc     |              |     |     |
|                    |                                                                                      |      |                              |                              |            | Roots  | +P      | 1 ± 0.12b          | 1.21 ± 0.02a         | 1.02 ± 0.06b      | ***          | *** | ns  |
|                    |                                                                                      |      |                              |                              |            |        | -P      | 1.17 ± 0.18ab      | 1.26 ± 0.01a         | 0.68 ± 0.12c      |              |     |     |
| D-Glucuronate      |  | 363  | 35.6                         | 2.05                         | 6556-12-3  | YS     | +P      | 1 ± 0.09b          | 0.49 ± 0.04d         | 0.75 ± 0.05c      | ***          | *** | *** |
|                    |                                                                                      |      |                              |                              |            |        | -P      | 1.08 ± 0.05b       | 2.05 ± 0.21a         | 0.95 ± 0.05b      |              |     |     |
|                    |                                                                                      |      |                              |                              |            | Leaves | +P      | 1 ± 0.64e          | 0.95 ± 0.06e         | 4.45 ± 0.31b      | ***          | *** | *** |
|                    |                                                                                      |      |                              |                              |            |        | -P      | 3.25 ± 0.2c        | 1.74 ± 0.05d         | 6.8 ± 0.2a        |              |     |     |
|                    |                                                                                      |      |                              |                              |            | Roots  | +P      | 1 ± 0.26a          | 0.96 ± 0.01a         | 0.81 ± 0.05a      | ***          | **  | **  |
|                    |                                                                                      |      |                              |                              |            |        | -P      | 0.79 ± 0.09a       | 1 ± 0.01a            | 0.54 ± 0.09b      |              |     |     |

Continue on the next page



Light intensity and P interaction effect on Primary metabolites and/or related anaplerotic pathway metabolites to carbohydrates and amino acids of Longjing-43 cultivar measured by GC×GC-TOF/MS analysis (Data normalise to 1 based on treatment (FL+P) (*cont.*).

| Metabolites  | Chemical Structure                                                                   | Mass | 1st Dim<br>Time<br>(Minutes) | 2nd Dim<br>Time<br>(Seconds) | CAS        | Organ  | P level | Light Intensity    |                      |                   | Significance |     |     |
|--------------|--------------------------------------------------------------------------------------|------|------------------------------|------------------------------|------------|--------|---------|--------------------|----------------------|-------------------|--------------|-----|-----|
|              |                                                                                      |      |                              |                              |            |        |         | Full<br>Light (FL) | Medium<br>Light (ML) | Low<br>Light (LL) | FL           | ML  | LL  |
| D-Fructose   | 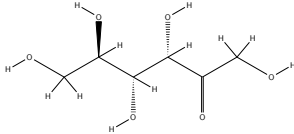   | 204  | 21.5                         | 2.26                         | 57-48-7    | YS     | +P      | 1 ± 0.03d          | 1.63 ± 0.03a         | 1.11 ± 0.03c      | ***          | *** | *   |
|              |                                                                                      |      |                              |                              |            |        | -P      | 0.79 ± 0.01e       | 1.42 ± 0.09b         | 0.82 ± 0.01e      |              |     |     |
|              |                                                                                      |      |                              |                              |            | Leaves | +P      | 1 ± 0.64b          | 0.95 ± 0.06b         | 1.72 ± 0.04a      | *            | *** | *** |
|              |                                                                                      |      |                              |                              |            |        | -P      | 1.65 ± 0.05a       | 1.74 ± 0.05a         | 1.49 ± 0.09a      |              |     |     |
|              |                                                                                      |      |                              |                              |            | Roots  | +P      | 1 ± 0.09bc         | 0.72 ± 0.05d         | 0.85 ± 0.05cd     | ***          | *** | *** |
|              |                                                                                      |      |                              |                              |            |        | -P      | 1.33 ± 0.11a       | 1.12 ± 0.22b         | 0.83 ± 0cd        |              |     |     |
| D-Mannose    |    | 103  | 29.5                         | 2.5                          | 31103-86-3 | YS     | +P      | 1 ± 0.01e          | 2.05 ± 0.15b         | 1.64 ± 0.06c      | ***          | *** | ns  |
|              |                                                                                      |      |                              |                              |            |        | -P      | 1.4 ± 0.04d        | 2.44 ± 0.04a         | 0.97 ± 0.01e      |              |     |     |
|              |                                                                                      |      |                              |                              |            | Leaves | +P      | 1 ± 0.42d          | 3.12 ± 0.05d         | 34.8 ± 4.15b      | ***          | *** | *** |
|              |                                                                                      |      |                              |                              |            |        | -P      | 21.89 ± 2c         | 4.92 ± 0.38d         | 66.59 ± 4.03a     |              |     |     |
|              |                                                                                      |      |                              |                              |            | Roots  | +P      | 1 ± 0.28bc         | 0.75 ± 0.24c         | 1.31 ± 0.36bc     | ***          | *** | *** |
|              |                                                                                      |      |                              |                              |            |        | -P      | 0.78 ± 0.04c       | 2.85 ± 0.37a         | 1.86 ± 1.03b      |              |     |     |
| D-Mannose-6P |   | 260  | 28.5                         | 2.69                         | 3672-15-9  | YS     | +P      | 1 ± 0.07bc         | 0.84 ± 0.04d         | 0.87 ± 0.04d      | ***          | *** | *** |
|              |                                                                                      |      |                              |                              |            |        | -P      | 1.04 ± 0.04b       | 1.88 ± 0.13a         | 0.9 ± 0.05cd      |              |     |     |
|              |                                                                                      |      |                              |                              |            | Leaves | +P      | 1 ± 0.11d          | 1.3 ± 0.21d          | 17.62 ± 2.05b     | ***          | *** | *** |
|              |                                                                                      |      |                              |                              |            |        | -P      | 10.63 ± 1.11c      | 0.78 ± 0.07d         | 33.14 ± 1.95a     |              |     |     |
|              |                                                                                      |      |                              |                              |            | Roots  | +P      | 1 ± 0.13a          | 0.99 ± 0.01a         | 0.8 ± 0.08a       | ***          | **  | *   |
|              |                                                                                      |      |                              |                              |            |        | -P      | 0.93 ± 0.13a       | 1.01 ± 0a            | 0.49 ± 0.25b      |              |     |     |
| D-Gluconate  |  | 174  | 35                           | 2.1                          | 526-95-4   | YS     | +P      | 1 ± 0.02d          | 1.71 ± 0.04a         | 1.13 ± 0.03c      | ***          | *** | **  |
|              |                                                                                      |      |                              |                              |            |        | -P      | 0.76 ± 0.02e       | 1.36 ± 0.08b         | 0.8 ± 0.01e       |              |     |     |
|              |                                                                                      |      |                              |                              |            | Leaves | +P      | 1 ± 0.11b          | 1.3 ± 0.21a          | 1.06 ± 0.04b      | **           | *** | *** |
|              |                                                                                      |      |                              |                              |            |        | -P      | 1.06 ± 0.03b       | 0.78 ± 0.07c         | 0.74 ± 0.06c      |              |     |     |
|              |                                                                                      |      |                              |                              |            | Roots  | +P      | 1 ± 0.13a          | 0.99 ± 0.01a         | 0.64 ± 0.09b      | ***          | *** | *** |
|              |                                                                                      |      |                              |                              |            |        | -P      | 0.93 ± 0.13a       | 1.01 ± 0a            | 0.09 ± 0.01c      |              |     |     |

Continue on the next page

Light intensity and P interaction effect on Primary metabolites and/or related anaplerotic pathway metabolites to carbohydrates and amino acids of Longjing-43 cultivar measured by GC×GC-TOF/MS analysis (Data normalise to 1 based on treatment (FL+P) (*cont.*).

| Metabolites    | Chemical Structure                                                                   | Mass | 1st Dim<br>Time<br>(Minutes) | 2nd Dim<br>Time<br>(Seconds) | CAS       | Organ  | P level | Light Intensity    |                      |                   | Significance |     |     |
|----------------|--------------------------------------------------------------------------------------|------|------------------------------|------------------------------|-----------|--------|---------|--------------------|----------------------|-------------------|--------------|-----|-----|
|                |                                                                                      |      |                              |                              |           |        |         | Full<br>Light (FL) | Medium<br>Light (ML) | Low<br>Light (LL) | FL           | ML  | LL  |
| D-gluconate 6P | 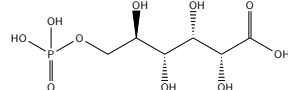   | 361  | 36.1                         | 2.35                         | 921-62-0  | YS     | +P      | 1 ± 0.06bc         | 1.08 ± 0.04b         | 0.95 ± 0.04cd     | ***          | *** | *** |
|                |                                                                                      |      |                              |                              |           |        | -P      | 1.02 ± 0.03bc      | 1.77 ± 0.08a         | 0.87 ± 0.05d      |              |     |     |
|                |                                                                                      |      |                              |                              |           | Leaves | +P      | 1 ± 0.55c          | 0.96 ± 0.21c         | 2.9 ± 0.35b       | ***          | *** | *** |
|                |                                                                                      |      |                              |                              |           |        | -P      | 4.02 ± 0.17a       | 3.05 ± 0.19b         | 0.91 ± 0.39c      |              |     |     |
|                |                                                                                      |      |                              |                              |           | Roots  | +P      | 1 ± 0.08bc         | 1.14 ± 0.24b         | 0.98 ± 0.09bc     | ***          | *** | *** |
|                |                                                                                      |      |                              |                              |           |        | -P      | 0.82 ± 0c          | 2.18 ± 0.33a         | 0.86 ± 0.01bc     |              |     |     |
| D-Ribulose5P   |    | 243  | 19.2                         | 2.56                         | 551-85-9  | YS     | +P      | 1 ± 0.02d          | 1.73 ± 0.03a         | 1.16 ± 0.04c      | ***          | *** | *** |
|                |                                                                                      |      |                              |                              |           |        | -P      | 0.74 ± 0.01e       | 1.42 ± 0.02b         | 0.74 ± 0e         |              |     |     |
|                |                                                                                      |      |                              |                              |           | Leaves | +P      | 1 ± 0.76bc         | 0.78 ± 0.15c         | 1.59 ± 0.08a      | ***          | ns  | ns  |
|                |                                                                                      |      |                              |                              |           |        | -P      | 1.22 ± 0.05abc     | 1.1 ± 0.1abc         | 1.42 ± 0.08ab     |              |     |     |
|                |                                                                                      |      |                              |                              |           | Roots  | +P      | 1 ± 0.13b          | 0.5 ± 0.02d          | 0.64 ± 0.02c      | ***          | *** | *** |
|                |                                                                                      |      |                              |                              |           |        | -P      | 1.31 ± 0.07a       | 0.97 ± 0.08b         | 0.72 ± 0.03c      |              |     |     |
| D-Ribose-5P    |   | 39   | 10.7                         | 1.96                         | 4300-28-1 | YS     | +P      | 1 ± 0.05c          | 1.32 ± 0.04b         | 1.03 ± 0.04c      | ***          | *   | *** |
|                |                                                                                      |      |                              |                              |           |        | -P      | 0.99 ± 0.03c       | 1.64 ± 0.04a         | 0.82 ± 0.05d      |              |     |     |
|                |                                                                                      |      |                              |                              |           | Leaves | +P      | 1 ± 0.39e          | 0.27 ± 0f            | 4.94 ± 0.56b      | ***          | *** | *** |
|                |                                                                                      |      |                              |                              |           |        | -P      | 3.96 ± 0.24c       | 2.13 ± 0.27d         | 8.78 ± 0.46a      |              |     |     |
|                |                                                                                      |      |                              |                              |           | Roots  | +P      | 1 ± 0.16b          | 0.76 ± 0.01b         | 0.78 ± 0.02b      | ***          | *** | *** |
|                |                                                                                      |      |                              |                              |           |        | -P      | 1.56 ± 0.29a       | 1 ± 0.07b            | 0.76 ± 0.08b      |              |     |     |
| Ribose         |  | 50   | 7.2                          | 1.41                         | 50-69-1   | YS     | +P      | 1 ± 0.04c          | 1.73 ± 0.02a         | 0.73 ± 0.06d      | ***          | *** | *** |
|                |                                                                                      |      |                              |                              |           |        | -P      | 1.07 ± 0.05c       | 1.76 ± 0.03a         | 1.21 ± 0.03b      |              |     |     |
|                |                                                                                      |      |                              |                              |           | Leaves | +P      | 1 ± 0.08e          | 0.61 ± 0.13f         | 2.85 ± 0.2b       | ***          | *** | ns  |
|                |                                                                                      |      |                              |                              |           |        | -P      | 2.54 ± 0.12c       | 2.05 ± 0.11d         | 4.11 ± 0.23a      |              |     |     |
|                |                                                                                      |      |                              |                              |           | Roots  | +P      | 1 ± 0.21d          | 5.09 ± 0.03b         | 5.26 ± 0.52b      | ***          | *** | *** |
|                |                                                                                      |      |                              |                              |           |        | -P      | 3.75 ± 1.07c       | 7.98 ± 1.29a         | 4.27 ± 0.02bc     |              |     |     |

Continue on the next page

Light intensity and P interaction effect on Primary metabolites and/or related anaplerotic pathway metabolites to carbohydrates and amino acids of Longjing-43 cultivar measured by GC×GC-TOF/MS analysis (Data normalise to 1 based on treatment (FL+P) (*cont.*).

| Metabolites   | Chemical Structure                                                                   | Mass | 1st Dim<br>Time<br>(Minutes) | 2nd Dim<br>Time<br>(Seconds) | CAS        | Organ  | P level | Light Intensity    |                      |                   | Significance |     |     |
|---------------|--------------------------------------------------------------------------------------|------|------------------------------|------------------------------|------------|--------|---------|--------------------|----------------------|-------------------|--------------|-----|-----|
|               |                                                                                      |      |                              |                              |            |        |         | Full<br>Light (FL) | Medium<br>Light (ML) | Low<br>Light (LL) | FL           | ML  | LL  |
| D-Xylulose-5P | 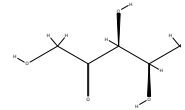   | 217  | 16.1                         | 2.08                         | 60802-29-1 | YS     | +P      | 1 ± 0.09d          | 2.43 ± 0.04a         | 1.64 ± 0.04b      | ***          | *** | *** |
|               |                                                                                      |      |                              |                              |            |        | -P      | 1.07 ± 0.03d       | 1.53 ± 0.07c         | 0.81 ± 0.06e      |              |     |     |
|               |                                                                                      |      |                              |                              |            | Leaves | +P      | 1 ± 0.77c          | 1.99 ± 0.1a          | 1.28 ± 0.15bc     | ***          | *** | ns  |
|               |                                                                                      |      |                              |                              |            |        | -P      | 1.77 ± 0.03ab      | 2.11 ± 0.02a         | 0.03 ± 0.01d      |              |     |     |
|               |                                                                                      |      |                              |                              |            | Roots  | +P      | 1 ± 0.06d          | 0.6 ± 0.02e          | 1.81 ± 0.05bc     | ***          | *** | *** |
|               |                                                                                      |      |                              |                              |            |        | -P      | 1.62 ± 0.15c       | 2.07 ± 0.37b         | 3.05 ± 0.14a      |              |     |     |
| D-Xylulose    |    | 69   | 10.7                         | 1.86                         | 551-84-8   | YS     | +P      | 1 ± 0.09c          | 2.37 ± 0.04a         | 1.6 ± 0.04b       | ***          | *** | *** |
|               |                                                                                      |      |                              |                              |            |        | -P      | 1.07 ± 0.03c       | 1.51 ± 0.07b         | 0.84 ± 0.06d      |              |     |     |
|               |                                                                                      |      |                              |                              |            | Leaves | +P      | 1 ± 0.4d           | 1.55 ± 0.47d         | 10.12 ± 1.09b     | ***          | *** | *** |
|               |                                                                                      |      |                              |                              |            |        | -P      | 6.2 ± 0.59c        | 0.64 ± 0.08d         | 18.76 ± 1.11a     |              |     |     |
|               |                                                                                      |      |                              |                              |            | Roots  | +P      | 1 ± 0.06d          | 0.6 ± 0.02e          | 1.81 ± 0.05bc     | ***          | *** | *** |
|               |                                                                                      |      |                              |                              |            |        | -P      | 1.62 ± 0.15c       | 2.07 ± 0.37b         | 3.05 ± 0.14a      |              |     |     |
| D-Xylose      |   | 204  | 21.5                         | 0.04                         | 58-86-6    | YS     | +P      | 1 ± 0.09c          | 1.5 ± 0.06b          | 0.87 ± 0.06d      | ***          | *** | *** |
|               |                                                                                      |      |                              |                              |            |        | -P      | 1.06 ± 0.02c       | 2.31 ± 0.04a         | 1.56 ± 0.04b      |              |     |     |
|               |                                                                                      |      |                              |                              |            | Leaves | +P      | 1 ± 0.1a           | 0.3 ± 0.01e          | 0.85 ± 0.02b      | ***          | **  | *** |
|               |                                                                                      |      |                              |                              |            |        | -P      | 0.74 ± 0.03c       | 0.54 ± 0.02d         | 0.73 ± 0.01c      |              |     |     |
|               |                                                                                      |      |                              |                              |            | Roots  | +P      | 1 ± 0.11c          | 0.51 ± 0.01d         | 0.92 ± 0.2c       | ***          | *** | *** |
|               |                                                                                      |      |                              |                              |            |        | -P      | 1.35 ± 0.02b       | 0.39 ± 0.03d         | 1.72 ± 0.13a      |              |     |     |
| Xylitol       |  | 44   | 18.7                         | 1.5                          | 87-99-0    | YS     | +P      | 1 ± 0.08cd         | 2.14 ± 0.03a         | 1.47 ± 0.04b      | ***          | *** | *** |
|               |                                                                                      |      |                              |                              |            |        | -P      | 1.07 ± 0.02c       | 1.43 ± 0.06b         | 0.94 ± 0.06d      |              |     |     |
|               |                                                                                      |      |                              |                              |            | Leaves | +P      | 1 ± 0.1d           | 0.3 ± 0.01d          | 8.4 ± 0.93b       | ***          | *** | *** |
|               |                                                                                      |      |                              |                              |            |        | -P      | 5.15 ± 0.52c       | 0.54 ± 0.02d         | 15.38 ± 0.87a     |              |     |     |
|               |                                                                                      |      |                              |                              |            | Roots  | +P      | 1 ± 0.05b          | 1.42 ± 0.05a         | 1.02 ± 0.06b      | ***          | *** | *** |
|               |                                                                                      |      |                              |                              |            |        | -P      | 0.63 ± 0.02c       | 0.6 ± 0.3c           | 0.54 ± 0.1c       |              |     |     |

Continue on the next page

Light intensity and P interaction effect on Primary metabolites and/or related anaplerotic pathway metabolites to carbohydrates and amino acids of Longjing-43 cultivar measured by GC×GC-TOF/MS analysis (Data normalise to 1 based on treatment (FL+P) (*cont.*).

| Metabolites | Chemical Structure                                                                   | Mass | 1st Dim<br>Time<br>(Minutes) | 2nd Dim<br>Time<br>(Seconds) | CAS       | Organ  | P level | Light Intensity    |                      |                   | Significance |     |     |
|-------------|--------------------------------------------------------------------------------------|------|------------------------------|------------------------------|-----------|--------|---------|--------------------|----------------------|-------------------|--------------|-----|-----|
|             |                                                                                      |      |                              |                              |           |        |         | Full<br>Light (FL) | Medium<br>Light (ML) | Low<br>Light (LL) | FL           | ML  | LL  |
| L-Xylulose  | 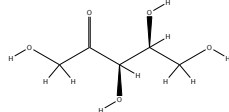   | 217  | 16.1                         | 2.08                         | 527-50-4  | YS     | +P      | 1 ± 0.09cd         | 2.18 ± 0.03a         | 1.49 ± 0.04b      | ***          | *** | *** |
|             |                                                                                      |      |                              |                              |           |        | -P      | 1.06 ± 0.02c       | 1.45 ± 0.06b         | 0.93 ± 0.06d      |              |     |     |
|             |                                                                                      |      |                              |                              |           | Leaves | +P      | 1 ± 0.28b          | 0.71 ± 0.02c         | 1.57 ± 0.11a      | ***          | *** | ns  |
|             |                                                                                      |      |                              |                              |           |        | -P      | 1.69 ± 0.1a        | 0.87 ± 0.02bc        | 0.85 ± 0.15bc     |              |     |     |
|             |                                                                                      |      |                              |                              |           | Roots  | +P      | 1 ± 0.15b          | 0.47 ± 0.01cd        | 0.53 ± 0.1cd      | ***          | *** | *** |
|             |                                                                                      |      |                              |                              |           |        | -P      | 1.49 ± 0.23a       | 0.42 ± 0d            | 0.7 ± 0.22c       |              |     |     |
| L-Arabitol  |    | 217  | 18.8                         | 2.16                         | 7643-75-6 | YS     | +P      | 1 ± 0.09cd         | 2.21 ± 0.03a         | 1.5 ± 0.04b       | ***          | *** | *** |
|             |                                                                                      |      |                              |                              |           |        | -P      | 1.05 ± 0.02c       | 1.47 ± 0.06b         | 0.91 ± 0.06d      |              |     |     |
|             |                                                                                      |      |                              |                              |           | Leaves | +P      | 1 ± 0.01a          | 0.51 ± 0.02e         | 0.88 ± 0.04b      | ***          | *** | *** |
|             |                                                                                      |      |                              |                              |           |        | -P      | 0.74 ± 0.04c       | 0.35 ± 0.03f         | 0.58 ± 0.06d      |              |     |     |
|             |                                                                                      |      |                              |                              |           | Roots  | +P      | 1 ± 0.22ab         | 0.94 ± 0.3ab         | 0.75 ± 0.18ab     | **           | ns  | ns  |
|             |                                                                                      |      |                              |                              |           |        | -P      | 1.11 ± 0.11ab      | 1.18 ± 0.26a         | 0.7 ± 0.36b       |              |     |     |
| L-Arabinose |   | 89   | 11.7                         | 2.3                          | 147-81-9  | YS     | +P      | 1 ± 0.05d          | 1.84 ± 0.03a         | 1.21 ± 0.03c      | ***          | *** | *** |
|             |                                                                                      |      |                              |                              |           |        | -P      | 0.9 ± 0.04e        | 1.57 ± 0.06b         | 0.63 ± 0.06f      |              |     |     |
|             |                                                                                      |      |                              |                              |           | Leaves | +P      | 1 ± 0.34a          | 0.27 ± 0.01b         | 0.97 ± 0.08a      | ***          | *** | *** |
|             |                                                                                      |      |                              |                              |           |        | -P      | 0.76 ± 0.03a       | 0.49 ± 0.02b         | 0.37 ± 0.05b      |              |     |     |
|             |                                                                                      |      |                              |                              |           | Roots  | +P      | 1 ± 1.36c          | 0.14 ± 0.02c         | 2.87 ± 0.09b      | ***          | *** | *** |
|             |                                                                                      |      |                              |                              |           |        | -P      | 0.24 ± 0c          | 6.77 ± 1.56a         | 5.66 ± 0.18a      |              |     |     |
| L-Serine    |  | 116  | 10.7                         | 2.05                         | 56-45-1   | YS     | +P      | 1 ± 0.03d          | 2.23 ± 0.04a         | 1.45 ± 0.04b      | ***          | *** | *** |
|             |                                                                                      |      |                              |                              |           |        | -P      | 0.95 ± 0.06d       | 1.26 ± 0.06c         | 0.73 ± 0.06e      |              |     |     |
|             |                                                                                      |      |                              |                              |           | Leaves | +P      | 1 ± 0.64e          | 3.7 ± 0.02d          | 11.22 ± 1.12b     | ***          | *** | *** |
|             |                                                                                      |      |                              |                              |           |        | -P      | 7.3 ± 0.71c        | 0.38 ± 0.03e         | 19.52 ± 1.17a     |              |     |     |
|             |                                                                                      |      |                              |                              |           | Roots  | +P      | 1 ± 0.08a          | 0.52 ± 0.1c          | 0.54 ± 0.09c      | ***          | *** | ns  |
|             |                                                                                      |      |                              |                              |           |        | -P      | 0.74 ± 0.12b       | 0.99 ± 0.12a         | 0.48 ± 0.12c      |              |     |     |

Continue on the next page

Light intensity and P interaction effect on Primary metabolites and/or related anaplerotic pathway metabolites to carbohydrates and amino acids of Longjing-43 cultivar measured by GC×GC-TOF/MS analysis (Data normalise to 1 based on treatment (FL+P) (*cont.*).

| Metabolites            | Chemical Structure                                                                   | Mass | 1st Dim<br>Time<br>(Minutes) | 2nd Dim<br>Time<br>(Seconds) | CAS       | Organ  | P level | Light Intensity    |                      |                   | Significance |     |     |
|------------------------|--------------------------------------------------------------------------------------|------|------------------------------|------------------------------|-----------|--------|---------|--------------------|----------------------|-------------------|--------------|-----|-----|
|                        |                                                                                      |      |                              |                              |           |        |         | Full<br>Light (FL) | Medium<br>Light (ML) | Low<br>Light (LL) | FL           | ML  | LL  |
| Glycine                | 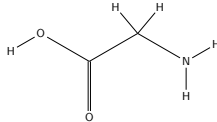   | 178  | 36.8                         | 0.04                         | 56-40-6   | YS     | +P      | 1 ± 0.05d          | 1.81 ± 0.02a         | 1.19 ± 0.03c      | ***          | *** | *** |
|                        |                                                                                      |      |                              |                              |           |        | -P      | 0.9 ± 0.03e        | 1.51 ± 0.06b         | 0.65 ± 0.05f      |              |     |     |
|                        |                                                                                      |      |                              |                              |           | Leaves | +P      | 1 ± 0.26d          | 0.32 ± 0.01d         | 23.63 ± 2.87b     | ***          | *** | *** |
|                        |                                                                                      |      |                              |                              |           |        | -P      | 13.94 ± 1.53c      | 0.26 ± 0.01d         | 45.4 ± 2.76a      |              |     |     |
|                        |                                                                                      |      |                              |                              |           | Roots  | +P      | 1 ± 0.19cd         | 0.78 ± 0.17d         | 1.14 ± 0.14bcd    | **           | *** | ns  |
|                        |                                                                                      |      |                              |                              |           |        | -P      | 1.37 ± 0.28abc     | 1.45 ± 0.02ab        | 1.72 ± 0.33a      |              |     |     |
| Threonine              |    | 102  | 16.2                         | 2.2                          | 72-19-5   | YS     | +P      | 1 ± 0.03d          | 2.18 ± 0.04a         | 1.42 ± 0.04b      | ***          | *** | *** |
|                        |                                                                                      |      |                              |                              |           |        | -P      | 0.95 ± 0.06d       | 1.24 ± 0.06c         | 0.75 ± 0.06e      |              |     |     |
|                        |                                                                                      |      |                              |                              |           | Leaves | +P      | 1 ± 0.17c          | 0.95 ± 0.01c         | 0.6 ± 0.02c       | ***          | *** | *** |
|                        |                                                                                      |      |                              |                              |           |        | -P      | 2.9 ± 0.48b        | 8.32 ± 0.47a         | 0.55 ± 0.01c      |              |     |     |
|                        |                                                                                      |      |                              |                              |           | Roots  | +P      | 1 ± 0.08a          | 0.33 ± 0c            | 0.46 ± 0.09c      | ***          | ns  | *** |
|                        |                                                                                      |      |                              |                              |           |        | -P      | 0.65 ± 0.07b       | 0.96 ± 0.22a         | 0.4 ± 0c          |              |     |     |
| L-Homoserine           |   | 74   | 10.5                         | 1.62                         | 56-45-1   | YS     | +P      | 1 ± 0.05d          | 1.79 ± 0.02a         | 1.19 ± 0.03c      | ***          | *** | *** |
|                        |                                                                                      |      |                              |                              |           |        | -P      | 0.9 ± 0.03e        | 1.49 ± 0.07b         | 0.66 ± 0.05f      |              |     |     |
|                        |                                                                                      |      |                              |                              |           | Leaves | +P      | 1 ± 0.1e           | 1.12 ± 0.01e         | 1.6 ± 0.09d       | ***          | *** | *** |
|                        |                                                                                      |      |                              |                              |           |        | -P      | 1.97 ± 0.08c       | 2.71 ± 0.1a          | 2.18 ± 0.03b      |              |     |     |
|                        |                                                                                      |      |                              |                              |           | Roots  | +P      | 1 ± 0.13b          | 0.52 ± 0c            | 0.81 ± 0.11bc     | ***          | *** | *** |
|                        |                                                                                      |      |                              |                              |           |        | -P      | 1.55 ± 0.12a       | 1.48 ± 0.34a         | 0.87 ± 0.14b      |              |     |     |
| O-Phospho-L-homoserine |  | 68   | 18.4                         | 2.24                         | 4210-66-6 | YS     | +P      | 1 ± 0.06d          | 2.31 ± 0.05a         | 1.49 ± 0.04b      | ***          | *** | *** |
|                        |                                                                                      |      |                              |                              |           |        | -P      | 1.04 ± 0.04d       | 1.27 ± 0.07c         | 0.76 ± 0.07e      |              |     |     |
|                        |                                                                                      |      |                              |                              |           | Leaves | +P      | 1 ± 0.31d          | 1.64 ± 0.05d         | 9.93 ± 1.04b      | ***          | *** | *** |
|                        |                                                                                      |      |                              |                              |           |        | -P      | 6.62 ± 0.56c       | 1.58 ± 0.02d         | 17.64 ± 1.02a     |              |     |     |
|                        |                                                                                      |      |                              |                              |           | Roots  | +P      | 1 ± 0.08ab         | 0.89 ± 0.02b         | 0.97 ± 0ab        | ***          | ns  | ns  |
|                        |                                                                                      |      |                              |                              |           |        | -P      | 1.09 ± 0.15a       | 1.09 ± 0.04a         | 1.03 ± 0.02a      |              |     |     |

Continue on the next page

Light intensity and P interaction effect on Primary metabolites and/or related anaplerotic pathway metabolites to carbohydrates and amino acids of Longjing-43 cultivar measured by GC×GC-TOF/MS analysis (Data normalise to 1 based on treatment (FL+P) (*cont.*).

| Metabolites    | Chemical Structure                                                                   | Mass | 1st Dim<br>Time<br>(Minutes) | 2nd Dim<br>Time<br>(Seconds) | CAS      | Organ  | P level | Light Intensity    |                      |                   | Significance |     |     |
|----------------|--------------------------------------------------------------------------------------|------|------------------------------|------------------------------|----------|--------|---------|--------------------|----------------------|-------------------|--------------|-----|-----|
|                |                                                                                      |      |                              |                              |          |        |         | Full<br>Light (FL) | Medium<br>Light (ML) | Low<br>Light (LL) | FL           | ML  | LL  |
| L-Leucine      | 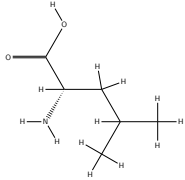   | 200  | 17.3                         | 2.84                         | 61-90-5  | YS     | +P      | 1 ± 0.05d          | 1.74 ± 0.02a         | 1.17 ± 0.04c      | ***          | *** | *** |
|                |                                                                                      |      |                              |                              |          | Leaves | -P      | 0.93 ± 0.03d       | 1.5 ± 0.07b          | 0.71 ± 0.05e      |              |     |     |
|                |                                                                                      |      |                              |                              |          |        | +P      | 1 ± 0.04d          | 1.04 ± 0.01d         | 2.02 ± 0.13cd     | ***          | *** | *** |
|                |                                                                                      |      |                              |                              |          | Roots  | -P      | 7.45 ± 1.18b       | 20.79 ± 1.24a        | 3.07 ± 0.15c      |              |     |     |
|                |                                                                                      |      |                              |                              |          |        | +P      | 1 ± 0.07b          | 0.63 ± 0.04d         | 0.51 ± 0.03e      | ***          | *** | *** |
|                |                                                                                      |      |                              |                              |          |        | -P      | 1.27 ± 0.01a       | 0.9 ± 0.07c          | 0.34 ± 0.02f      |              |     |     |
| L-IsoLeucine   |    | 158  | 11.2                         | 1.9                          | 73-32-5  | YS     | +P      | 1 ± 0.06d          | 1.27 ± 0.06c         | 0.78 ± 0.07e      | ***          | *** | *** |
|                |                                                                                      |      |                              |                              |          | Leaves | -P      | 1.05 ± 0.04d       | 2.28 ± 0.04a         | 1.47 ± 0.04b      |              |     |     |
|                |                                                                                      |      |                              |                              |          |        | +P      | 1 ± 0.27e          | 1.59 ± 0.05d         | 4.75 ± 0.4b       | ***          | *** | *** |
|                |                                                                                      |      |                              |                              |          | Roots  | -P      | 3.41 ± 0.25c       | 0.9 ± 0.11e          | 7.62 ± 0.41a      |              |     |     |
|                |                                                                                      |      |                              |                              |          |        | +P      | 1 ± 0.07b          | 0.63 ± 0.04d         | 0.51 ± 0.03e      | ***          | *** | *** |
|                |                                                                                      |      |                              |                              |          |        | -P      | 1.27 ± 0.01a       | 0.9 ± 0.07c          | 0.34 ± 0.02f      |              |     |     |
| L-Valine       |   | 142  | 16.4                         | 2.86                         | 72-18-4  | YS     | +P      | 1 ± 0.04d          | 1.65 ± 0.02a         | 1.08 ± 0.03c      | ***          | *** | *** |
|                |                                                                                      |      |                              |                              |          | Leaves | -P      | 0.88 ± 0.03e       | 1.26 ± 0.04b         | 0.65 ± 0.05f      |              |     |     |
|                |                                                                                      |      |                              |                              |          |        | +P      | 1 ± 0.18e          | 1.24 ± 0.24e         | 5.88 ± 0.56b      | ***          | *** | *** |
|                |                                                                                      |      |                              |                              |          | Roots  | -P      | 4.7 ± 0.23c        | 2.62 ± 0.28d         | 9.88 ± 0.5a       |              |     |     |
|                |                                                                                      |      |                              |                              |          |        | +P      | 1 ± 0a             | 0.49 ± 0.03d         | 0.4 ± 0.02e       | ***          | *** | *** |
|                |                                                                                      |      |                              |                              |          |        | -P      | 0.79 ± 0.05b       | 0.7 ± 0.06c          | 0.27 ± 0.02f      |              |     |     |
| Phenylpyruvate |  | 120  | 15.9                         | 2.97                         | 156-06-9 | YS     | +P      | 1 ± 0.04c          | 1.62 ± 0.02a         | 1.06 ± 0.03c      | ***          | *** | *** |
|                |                                                                                      |      |                              |                              |          | Leaves | -P      | 0.88 ± 0.03d       | 1.25 ± 0.04b         | 0.65 ± 0.05e      |              |     |     |
|                |                                                                                      |      |                              |                              |          |        | +P      | 1 ± 0.02d          | 0.55 ± 0.01e         | 3.02 ± 0.24b      | ***          | *** | *** |
|                |                                                                                      |      |                              |                              |          | Roots  | -P      | 2.51 ± 0.21c       | 0.68 ± 0.01e         | 3.89 ± 0.16a      |              |     |     |
|                |                                                                                      |      |                              |                              |          |        | +P      | 1 ± 0.17c          | 1.48 ± 0.06a         | 1.16 ± 0.01b      | ***          | *** | *** |
|                |                                                                                      |      |                              |                              |          |        | -P      | 0.66 ± 0.07d       | 0.85 ± 0.08c         | 0.87 ± 0.04c      |              |     |     |

Continue on the next page

Light intensity and P interaction effect on Primary metabolites and/or related anaplerotic pathway metabolites to carbohydrates and amino acids of Longjing-43 cultivar measured by GC×GC-TOF/MS analysis (Data normalise to 1 based on treatment (FL+P) (*cont.*).

| Metabolites              | Chemical Structure                                                                   | Mass | 1st Dim<br>Time<br>(Minutes) | 2nd Dim<br>Time<br>(Seconds) | CAS      | Organ  | P level | Light Intensity    |                      |                   | Significance |     |     |
|--------------------------|--------------------------------------------------------------------------------------|------|------------------------------|------------------------------|----------|--------|---------|--------------------|----------------------|-------------------|--------------|-----|-----|
|                          |                                                                                      |      |                              |                              |          |        |         | Full<br>Light (FL) | Medium<br>Light (ML) | Low<br>Light (LL) | FL           | ML  | LL  |
| L-Phenylalanine          | 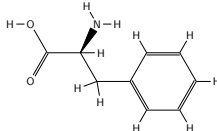   | 154  | 20.7                         | 3.34                         | 63-91-2  | YS     | +P      | 1 ± 0.03d          | 1.6 ± 0.08b          | 0.78 ± 0.06e      | ***          | *** | *** |
|                          |                                                                                      |      |                              |                              |          |        | -P      | 1.07 ± 0.06d       | 1.85 ± 0.03a         | 1.25 ± 0.04c      |              |     |     |
|                          |                                                                                      |      |                              |                              |          | Leaves | +P      | 1 ± 0.42b          | 0.43 ± 0c            | 0.98 ± 0.07b      | ***          | *** | **  |
|                          |                                                                                      |      |                              |                              |          |        | -P      | 0.96 ± 0.03b       | 0.87 ± 0.09b         | 1.49 ± 0.08a      |              |     |     |
|                          |                                                                                      |      |                              |                              |          | Roots  | +P      | 1 ± 0.07b          | 1.25 ± 0.05a         | 0.96 ± 0.05b      | ***          | *** | *** |
|                          |                                                                                      |      |                              |                              |          |        | -P      | 1.23 ± 0.18a       | 0.92 ± 0b            | 0.64 ± 0.07c      |              |     |     |
| 4-Hydroxy-phenylpyruvate |    | 133  | 16                           | 1.44                         | 156-39-8 | YS     | +P      | 1 ± 0.04c          | 1.59 ± 0.02a         | 1.04 ± 0.03c      | ***          | *** | *** |
|                          |                                                                                      |      |                              |                              |          |        | -P      | 0.88 ± 0.03d       | 1.25 ± 0.05b         | 0.65 ± 0.05e      |              |     |     |
|                          |                                                                                      |      |                              |                              |          | Leaves | +P      | 1 ± 0.43b          | 0.66 ± 0.01c         | 1.49 ± 0.11a      | ***          | ns  | *** |
|                          |                                                                                      |      |                              |                              |          |        | -P      | 1.52 ± 0.1a        | 0.68 ± 0bc           | 0.58 ± 0.06c      |              |     |     |
|                          |                                                                                      |      |                              |                              |          | Roots  | +P      | 1 ± 0.14b          | 1.1 ± 0.12b          | 1.31 ± 0.11b      | ***          | *** | *** |
|                          |                                                                                      |      |                              |                              |          |        | -P      | 1.07 ± 0.08b       | 3.03 ± 0.61a         | 1.22 ± 0.21b      |              |     |     |
| L-Tyrosine               |   | 218  | 24.7                         | 2.99                         | 60-18-4  | YS     | +P      | 1 ± 0.05d          | 1.71 ± 0.03a         | 1.16 ± 0.04c      | ***          | *** | *** |
|                          |                                                                                      |      |                              |                              |          |        | -P      | 0.93 ± 0.03d       | 1.48 ± 0.08b         | 0.74 ± 0.05e      |              |     |     |
|                          |                                                                                      |      |                              |                              |          | Leaves | +P      | 1 ± 0.06d          | 0.85 ± 0.43d         | 2.04 ± 0.11c      | *            | *** | *** |
|                          |                                                                                      |      |                              |                              |          |        | -P      | 2.87 ± 0.15b       | 3.61 ± 0.53a         | 2.5 ± 0.01bc      |              |     |     |
|                          |                                                                                      |      |                              |                              |          | Roots  | +P      | 1 ± 0.19b          | 1.21 ± 0.01a         | 1.11 ± 0.01ab     | **           | *   | ns  |
|                          |                                                                                      |      |                              |                              |          |        | -P      | 1.03 ± 0.1b        | 1.08 ± 0.05ab        | 0.98 ± 0.01b      |              |     |     |
| L-Tryptophan             |  | 146  | 17                           | 2.65                         | 73-22-3  | YS     | +P      | 1 ± 0.02c          | 1.61 ± 0.07b         | 0.85 ± 0.05d      | ***          | *** | *** |
|                          |                                                                                      |      |                              |                              |          |        | -P      | 1.06 ± 0.1c        | 2.49 ± 0.03a         | 1.57 ± 0.05b      |              |     |     |
|                          |                                                                                      |      |                              |                              |          | Leaves | +P      | 1 ± 0.19de         | 0.51 ± 0.2e          | 6.25 ± 0.69b      | ***          | *** | *** |
|                          |                                                                                      |      |                              |                              |          |        | -P      | 4.18 ± 0.34c       | 1.45 ± 0.08d         | 11.47 ± 0.58a     |              |     |     |
|                          |                                                                                      |      |                              |                              |          | Roots  | +P      | 1 ± 0.19b          | 1.21 ± 0.01a         | 1.11 ± 0.01ab     | **           | *   | ns  |
|                          |                                                                                      |      |                              |                              |          |        | -P      | 1.03 ± 0.1b        | 1.08 ± 0.05ab        | 0.98 ± 0.01b      |              |     |     |

Continue on the next page

Light intensity and P interaction effect on Primary metabolites and/or related anaplerotic pathway metabolites to carbohydrates and amino acids of Longjing-43 cultivar measured by GC×GC-TOF/MS analysis (Data normalise to 1 based on treatment (FL+P) (*cont.*).

| Metabolites  | Chemical Structure                                                                   | Mass | 1st Dim<br>Time<br>(Minutes) | 2nd Dim<br>Time<br>(Seconds) | CAS      | Organ  | P level | Light Intensity    |                      |                   | Significance |     |     |
|--------------|--------------------------------------------------------------------------------------|------|------------------------------|------------------------------|----------|--------|---------|--------------------|----------------------|-------------------|--------------|-----|-----|
|              |                                                                                      |      |                              |                              |          |        |         | Full<br>Light (FL) | Medium<br>Light (ML) | Low<br>Light (LL) | FL           | ML  | LL  |
| Oxalic acid  | 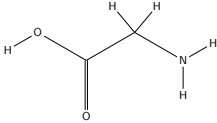   | 57   | 18.4                         | 2.3                          | 144-62-7 | YS     | +P      | 1 ± 0.08c          | 2.29 ± 0.04a         | 1.44 ± 0.05b      | ***          | *** | *** |
|              |                                                                                      |      |                              |                              |          |        | -P      | 0.91 ± 0.02d       | 1.45 ± 0.06b         | 0.74 ± 0.05e      |              |     |     |
|              |                                                                                      |      |                              |                              |          | Leaves | +P      | 1 ± 0.39b          | 0.17 ± 0.07c         | 0.28 ± 0.01c      | ***          | *** | *** |
|              |                                                                                      |      |                              |                              |          |        | -P      | 0.81 ± 0.1b        | 1.85 ± 0.13a         | 0.16 ± 0.03c      |              |     |     |
|              |                                                                                      |      |                              |                              |          | Roots  | +P      | 1 ± 0.18c          | 1.2 ± 0.01b          | 1.01 ± 0.07c      | ***          | *   | *** |
|              |                                                                                      |      |                              |                              |          |        | -P      | 0.93 ± 0.12c       | 1.38 ± 0.03a         | 0.66 ± 0.04d      |              |     |     |
| Citrate      |    | 101  | 9.5                          | 2.21                         | 77-92-9  | YS     | +P      | 1 ± 0.09c          | 2.35 ± 0.03a         | 1.48 ± 0.05b      | ***          | *** | *** |
|              |                                                                                      |      |                              |                              |          |        | -P      | 0.94 ± 0.02c       | 1.5 ± 0.06b          | 0.79 ± 0.05d      |              |     |     |
|              |                                                                                      |      |                              |                              |          | Leaves | +P      | 1 ± 0.42a          | 0.4 ± 0.12c          | 0.61 ± 0.07bc     | ***          | **  | ns  |
|              |                                                                                      |      |                              |                              |          |        | -P      | 0.87 ± 0.04ab      | 0.7 ± 0.01abc        | 0.45 ± 0.12c      |              |     |     |
|              |                                                                                      |      |                              |                              |          | Roots  | +P      | 1 ± 0.27bc         | 0.96 ± 0.18bc        | 1.18 ± 0.46b      | ***          | *** | *** |
|              |                                                                                      |      |                              |                              |          |        | -P      | 0.59 ± 0.33bc      | 4.76 ± 0.83a         | 0.33 ± 0.04c      |              |     |     |
| Isocitrate   |   | 73   | 22.5                         | 2.4                          | 320-77-4 | YS     | +P      | 1 ± 0.09c          | 2.32 ± 0.03a         | 1.47 ± 0.05b      | ***          | *** | *** |
|              |                                                                                      |      |                              |                              |          |        | -P      | 0.94 ± 0.02c       | 1.5 ± 0.06b          | 0.79 ± 0.05d      |              |     |     |
|              |                                                                                      |      |                              |                              |          | Leaves | +P      | 1 ± 0.22a          | 1.02 ± 0.1a          | 0.95 ± 0.06ab     | ***          | *** | *** |
|              |                                                                                      |      |                              |                              |          |        | -P      | 1.03 ± 0.06a       | 0.32 ± 0.07c         | 0.77 ± 0.01b      |              |     |     |
|              |                                                                                      |      |                              |                              |          | Roots  | +P      | 1 ± 0.07b          | 0.66 ± 0.24b         | 3.22 ± 2.05b      | ***          | *** | *** |
|              |                                                                                      |      |                              |                              |          |        | -P      | 1.23 ± 0.01b       | 34.03 ± 7.18a        | 1.37 ± 0.01b      |              |     |     |
| Oxoglutarate |  | 362  | 21.9                         | 2.53                         | 328-50-7 | YS     | +P      | 1 ± 0.02c          | 1.6 ± 0.07b          | 0.85 ± 0.05d      | ***          | *** | *** |
|              |                                                                                      |      |                              |                              |          |        | -P      | 1.06 ± 0.1c        | 2.46 ± 0.03a         | 1.56 ± 0.05b      |              |     |     |
|              |                                                                                      |      |                              |                              |          | Leaves | +P      | 1 ± 0.21d          | 0.92 ± 0.03de        | 3.6 ± 0.36b       | ***          | *** | *** |
|              |                                                                                      |      |                              |                              |          |        | -P      | 2.37 ± 0.19c       | 0.57 ± 0.01e         | 6.39 ± 0.36a      |              |     |     |
|              |                                                                                      |      |                              |                              |          | Roots  | +P      | 1 ± 0.15b          | 0.97 ± 0b            | 1.03 ± 0.08b      | ***          | *** | *** |
|              |                                                                                      |      |                              |                              |          |        | -P      | 1.05 ± 0.18b       | 1.71 ± 0.17a         | 0.91 ± 0.01b      |              |     |     |

Continue on the next page



Light intensity and P interaction effect on Primary metabolites and/or related anaplerotic pathway metabolites to carbohydrates and amino acids of Longjing-43 cultivar measured by GC×GC-TOF/MS analysis (Data normalise to 1 based on treatment (FL+P) (*cont.*).

| Metabolites | Chemical Structure                                                                   | Mass | 1st Dim<br>Time<br>(Minutes) | 2nd Dim<br>Time<br>(Seconds) | CAS      | Organ  | P level | Light Intensity    |                      |                   | Significance |     |     |
|-------------|--------------------------------------------------------------------------------------|------|------------------------------|------------------------------|----------|--------|---------|--------------------|----------------------|-------------------|--------------|-----|-----|
|             |                                                                                      |      |                              |                              |          |        |         | Full<br>Light (FL) | Medium<br>Light (ML) | Low<br>Light (LL) | FL           | ML  | LL  |
| Succinate   | 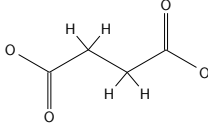   | 147  | 27.3                         | 2.65                         | 110-15-6 | YS     | +P      | 1 ± 0.08c          | 2.27 ± 0.03a         | 1.44 ± 0.05b      | ***          | *** | *** |
|             |                                                                                      |      |                              |                              |          |        | -P      | 0.92 ± 0.02c       | 1.47 ± 0.06b         | 0.77 ± 0.05d      |              |     |     |
|             |                                                                                      |      |                              |                              |          | Leaves | +P      | 1 ± 0.14d          | 0.66 ± 0.04de        | 3.24 ± 0.3b       | ***          | *** | *** |
|             |                                                                                      |      |                              |                              |          |        | -P      | 2.18 ± 0.2c        | 0.31 ± 0.03e         | 4.51 ± 0.41a      |              |     |     |
|             |                                                                                      |      |                              |                              |          | Roots  | +P      | 1 ± 0.21b          | 1.57 ± 0.18a         | 0.94 ± 0.07b      | ***          | *** | *** |
|             |                                                                                      |      |                              |                              |          |        | -P      | 0.58 ± 0.03c       | 0.48 ± 0.02c         | 0.4 ± 0.03c       |              |     |     |
| Fumarate    |    | 298  | 22.9                         | 3.5                          | 110-17-8 | YS     | +P      | 1 ± 0.06c          | 2.05 ± 0.03a         | 1.33 ± 0.03b      | ***          | *** | *** |
|             |                                                                                      |      |                              |                              |          |        | -P      | 1 ± 0.04c          | 1.33 ± 0.06b         | 0.75 ± 0.06d      |              |     |     |
|             |                                                                                      |      |                              |                              |          | Leaves | +P      | 1 ± 0.81bc         | 3.11 ± 0.22a         | 0.67 ± 0.2cd      | ***          | *** | *** |
|             |                                                                                      |      |                              |                              |          |        | -P      | 0.97 ± 0.17c       | 1.62 ± 0.21b         | 0.09 ± 0d         |              |     |     |
|             |                                                                                      |      |                              |                              |          | Roots  | +P      | 1 ± 0.02e          | 1.17 ± 0.08d         | 1.31 ± 0.04c      | ***          | *** | *** |
|             |                                                                                      |      |                              |                              |          |        | -P      | 0.66 ± 0.09f       | 1.64 ± 0.01a         | 1.5 ± 0.07b       |              |     |     |
| Malate      |   | 77   | 6                            | 0.1                          | 97-67-6  | YS     | +P      | 1 ± 0.06c          | 2.05 ± 0.03a         | 1.33 ± 0.04b      | ***          | *** | *** |
|             |                                                                                      |      |                              |                              |          |        | -P      | 0.99 ± 0.03c       | 1.33 ± 0.06b         | 0.75 ± 0.06d      |              |     |     |
|             |                                                                                      |      |                              |                              |          | Leaves | +P      | 1 ± 0.94a          | 0.11 ± 0.03b         | 1.17 ± 0.17a      | **           | *   | *** |
|             |                                                                                      |      |                              |                              |          |        | -P      | 0.73 ± 0.04ab      | 0.49 ± 0.02ab        | 0.05 ± 0.01b      |              |     |     |
|             |                                                                                      |      |                              |                              |          | Roots  | +P      | 1 ± 0.11b          | 0.91 ± 0bc           | 0.93 ± 0.04bc     | ***          | *** | *** |
|             |                                                                                      |      |                              |                              |          |        | -P      | 1.17 ± 0.06a       | 1.19 ± 0.05a         | 0.85 ± 0.01c      |              |     |     |
| L-Asparate  |  | 89   | 19.4                         | 2.82                         | 56-84-8  | YS     | +P      | 1 ± 0.09c          | 2.29 ± 0.03a         | 1.46 ± 0.05b      | ***          | *** | *** |
|             |                                                                                      |      |                              |                              |          |        | -P      | 0.95 ± 0.02c       | 1.5 ± 0.07b          | 0.8 ± 0.05d       |              |     |     |
|             |                                                                                      |      |                              |                              |          | Leaves | +P      | 1 ± 0.06d          | 1.56 ± 0.11b         | 1.41 ± 0.07c      | ***          | *** | *** |
|             |                                                                                      |      |                              |                              |          |        | -P      | 1.29 ± 0.04c       | 1.1 ± 0.1d           | 2.03 ± 0.09a      |              |     |     |
|             |                                                                                      |      |                              |                              |          | Roots  | +P      | 1 ± 0.07c          | 1.31 ± 0.23c         | 10.92 ± 1.84b     | ***          | *** | *** |
|             |                                                                                      |      |                              |                              |          |        | -P      | 0.8 ± 0c           | 0.51 ± 0.11c         | 24.67 ± 0.78a     |              |     |     |

Continue on the next page

Light intensity and P interaction effect on Primary metabolites and/or related anaplerotic pathway metabolites to carbohydrates and amino acids of Longjing-43 cultivar measured by GC×GC-TOF/MS analysis (Data normalise to 1 based on treatment (FL+P) (*cont.*).

| Metabolites  | Chemical Structure                                                                   | Mass | 1st Dim<br>Time<br>(Minutes) | 2nd Dim<br>Time<br>(Seconds) | CAS     | Organ  | P level | Light Intensity    |                      |                   | Significance |     |     |
|--------------|--------------------------------------------------------------------------------------|------|------------------------------|------------------------------|---------|--------|---------|--------------------|----------------------|-------------------|--------------|-----|-----|
|              |                                                                                      |      |                              |                              |         |        |         | Full<br>Light (FL) | Medium<br>Light (ML) | Low<br>Light (LL) | FL           | ML  | LL  |
| L-Alanine    | 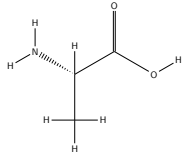   | 44   | 31.7                         | 1.44                         | 56-41-7 | YS     | +P      | 1 ± 0.03c          | 1.32 ± 0.06b         | 0.75 ± 0.06d      | ***          | *** | *** |
|              |                                                                                      |      |                              |                              |         |        | -P      | 1.02 ± 0.05c       | 1.96 ± 0.02a         | 1.29 ± 0.03b      |              |     |     |
|              |                                                                                      |      |                              |                              |         | Leaves | +P      | 1 ± 0.03a          | 0.35 ± 0.02e         | 0.95 ± 0.03ab     | ***          | *** | ns  |
|              |                                                                                      |      |                              |                              |         |        | -P      | 0.92 ± 0.04b       | 0.73 ± 0.02c         | 0.66 ± 0.03d      |              |     |     |
|              |                                                                                      |      |                              |                              |         | Roots  | +P      | 1 ± 0.29bc         | 0.25 ± 0c            | 0.83 ± 0.32bc     | ***          | *** | *   |
|              |                                                                                      |      |                              |                              |         |        | -P      | 2.73 ± 0.56a       | 1.36 ± 0.26b         | 1.23 ± 1.17bc     |              |     |     |
| L-Asparagine |    | 99   | 18.1                         | 2.7                          | 70-47-3 | YS     | +P      | 1 ± 0.05c          | 1.91 ± 0.02a         | 1.25 ± 0.03b      | ***          | *** | *** |
|              |                                                                                      |      |                              |                              |         |        | -P      | 0.98 ± 0.03c       | 1.29 ± 0.06b         | 0.74 ± 0.06d      |              |     |     |
|              |                                                                                      |      |                              |                              |         | Leaves | +P      | 1 ± 0.12ab         | 1.1 ± 0.38a          | 0.76 ± 0.06bc     | **           | *** | ns  |
|              |                                                                                      |      |                              |                              |         |        | -P      | 0.66 ± 0.03cd      | 0.59 ± 0.19cd        | 0.39 ± 0.1d       |              |     |     |
|              |                                                                                      |      |                              |                              |         | Roots  | +P      | 1 ± 0.11a          | 0.1 ± 0c             | 0.11 ± 0c         | ***          | *** | *** |
|              |                                                                                      |      |                              |                              |         |        | -P      | 0.52 ± 0.11b       | 0.13 ± 0.01c         | 0.11 ± 0.02c      |              |     |     |
| L-Glutamate  |   | 152  | 7.6                          | 2.34                         | 56-86-0 | YS     | +P      | 1 ± 0.03c          | 1.32 ± 0.07b         | 0.76 ± 0.06d      | ***          | *** | *** |
|              |                                                                                      |      |                              |                              |         |        | -P      | 1.03 ± 0.05c       | 1.92 ± 0.02a         | 1.26 ± 0.04b      |              |     |     |
|              |                                                                                      |      |                              |                              |         | Leaves | +P      | 1 ± 0.23d          | 0.73 ± 0.04de        | 3.64 ± 0.36b      | ***          | *** | *** |
|              |                                                                                      |      |                              |                              |         |        | -P      | 2.43 ± 0.23c       | 0.28 ± 0.03e         | 5.24 ± 0.49a      |              |     |     |
|              |                                                                                      |      |                              |                              |         | Roots  | +P      | 1 ± 0.12a          | 0.39 ± 0.03c         | 0.38 ± 0.05c      | ***          | *** | *** |
|              |                                                                                      |      |                              |                              |         |        | -P      | 0.65 ± 0.07b       | 0.22 ± 0d            | 0.45 ± 0.15c      |              |     |     |
| L-Glutamine  |  | 127  | 18.1                         | 3.24                         | 56-85-9 | YS     | +P      | 1 ± 0.05c          | 1.8 ± 0.02a          | 1.2 ± 0.03b       | ***          | *** | *** |
|              |                                                                                      |      |                              |                              |         |        | -P      | 0.96 ± 0.03c       | 1.26 ± 0.06b         | 0.73 ± 0.06d      |              |     |     |
|              |                                                                                      |      |                              |                              |         | Leaves | +P      | 1 ± 0.05a          | 0.56 ± 0.03d         | 0.93 ± 0.03b      | ***          | *** | **  |
|              |                                                                                      |      |                              |                              |         |        | -P      | 0.74 ± 0.05c       | 0.22 ± 0.03e         | 0.68 ± 0.03c      |              |     |     |
|              |                                                                                      |      |                              |                              |         | Roots  | +P      | 1 ± 0.25ab         | 1.72 ± 0.63a         | 1.28 ± 0.22a      | ***          | *   | ns  |
|              |                                                                                      |      |                              |                              |         |        | -P      | 0.26 ± 0b          | 1.28 ± 0.74a         | 1.4 ± 0.01a       |              |     |     |

Continue on the next page

Light intensity and P interaction effect on Primary metabolites and/or related anaplerotic pathway metabolites to carbohydrates and amino acids of Longjing-43 cultivar measured by GC×GC-TOF/MS analysis (Data normalise to 1 based on treatment (FL+P) (*cont.*).

| Metabolites           | Chemical Structure                                                                   | Mass | 1st Dim<br>Time<br>(Minutes) | 2nd Dim<br>Time<br>(Seconds) | CAS        | Organ  | P level | Light Intensity    |                      |                   | Significance |     |     |
|-----------------------|--------------------------------------------------------------------------------------|------|------------------------------|------------------------------|------------|--------|---------|--------------------|----------------------|-------------------|--------------|-----|-----|
|                       |                                                                                      |      |                              |                              |            |        |         | Full<br>Light (FL) | Medium<br>Light (ML) | Low<br>Light (LL) | FL           | ML  | LL  |
| L-Proline             | 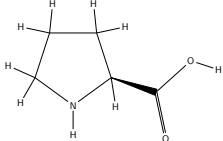   | 116  | 35                           | 2.46                         | 147-85-3   | YS     | +P      | 1 ± 0.11d          | 1.55 ± 0.08b         | 0.87 ± 0.06e      | ***          | *** | *** |
|                       |                                                                                      |      |                              |                              |            |        | -P      | 1 ± 0.02d          | 2.13 ± 0.03a         | 1.39 ± 0.05c      |              |     |     |
|                       |                                                                                      |      |                              |                              |            | Leaves | +P      | 1 ± 0.39d          | 0.19 ± 0.01e         | 3.43 ± 0.38b      | ***          | *** | *** |
|                       |                                                                                      |      |                              |                              |            |        | -P      | 2.18 ± 0.22c       | 0.25 ± 0e            | 6.13 ± 0.29a      |              |     |     |
|                       |                                                                                      |      |                              |                              |            | Roots  | +P      | 1 ± 0.03a          | 0.7 ± 0.03c          | 0.71 ± 0.03c      | ***          | *** | ns  |
|                       |                                                                                      |      |                              |                              |            |        | -P      | 0.89 ± 0.05b       | 0.79 ± 0c            | 0.74 ± 0.12c      |              |     |     |
| Hydroxyproline        |    | 230  | 6.3                          | 0.05                         | 51-35-4    | YS     | +P      | 1 ± 0.02d          | 2.07 ± 0.03a         | 1.36 ± 0.05c      | ***          | *** | *** |
|                       |                                                                                      |      |                              |                              |            |        | -P      | 1 ± 0.1d           | 1.52 ± 0.08b         | 0.87 ± 0.06e      |              |     |     |
|                       |                                                                                      |      |                              |                              |            | Leaves | +P      | 1 ± 0.06b          | 1.42 ± 0.01a         | 0.44 ± 0.08d      | ***          | *** | *** |
|                       |                                                                                      |      |                              |                              |            |        | -P      | 0.76 ± 0.08c       | 1.51 ± 0.02a         | 0.21 ± 0.01e      |              |     |     |
|                       |                                                                                      |      |                              |                              |            | Roots  | +P      | 1 ± 0.23a          | 0.58 ± 0.14abc       | 0.36 ± 0.1bc      | ***          | *   | ns  |
|                       |                                                                                      |      |                              |                              |            |        | -P      | 0.78 ± 0.48ab      | 0.19 ± 0.15c         | 0.39 ± 0.21bc     |              |     |     |
| Carbonyl-1P           |   | 156  | 18                           | 2.8                          | 590-55-6   | YS     | +P      | 1 ± 0.07d          | 1.88 ± 0.02a         | 1.23 ± 0.04c      | ***          | *** | *** |
|                       |                                                                                      |      |                              |                              |            |        | -P      | 0.94 ± 0.03d       | 1.39 ± 0.06b         | 0.76 ± 0.05e      |              |     |     |
|                       |                                                                                      |      |                              |                              |            | Leaves | +P      | 1 ± 0.2e           | 2.58 ± 0.11b         | 1.82 ± 0.06d      | ***          | *** | *** |
|                       |                                                                                      |      |                              |                              |            |        | -P      | 2.29 ± 0.07c       | 3.16 ± 0.13a         | 2.12 ± 0.02c      |              |     |     |
|                       |                                                                                      |      |                              |                              |            | Roots  | +P      | 1 ± 0.22c          | 1.92 ± 0.01a         | 1.42 ± 0.09b      | ***          | *** | *** |
|                       |                                                                                      |      |                              |                              |            |        | -P      | 0.44 ± 0.16e       | 1.71 ± 0.09a         | 0.73 ± 0.12d      |              |     |     |
| N-Acetyl-L-Citrulline |  | 112  | 22                           | 3.55                         | 33965-42-3 | YS     | +P      | 1 ± 0.07d          | 1.85 ± 0.02a         | 1.21 ± 0.04c      | ***          | *** | *** |
|                       |                                                                                      |      |                              |                              |            |        | -P      | 0.94 ± 0.03d       | 1.38 ± 0.06b         | 0.75 ± 0.05e      |              |     |     |
|                       |                                                                                      |      |                              |                              |            | Leaves | +P      | 1 ± 0.2e           | 2.58 ± 0.11b         | 1.82 ± 0.06d      | ***          | *** | *** |
|                       |                                                                                      |      |                              |                              |            |        | -P      | 2.29 ± 0.07c       | 3.16 ± 0.13a         | 2.12 ± 0.02c      |              |     |     |
|                       |                                                                                      |      |                              |                              |            | Roots  | +P      | 1 ± 0.12ab         | 1.13 ± 0.15a         | 0.89 ± 0.04bc     | ***          | *** | *** |
|                       |                                                                                      |      |                              |                              |            |        | -P      | 1.14 ± 0.17a       | 0.53 ± 0.03d         | 0.79 ± 0.1c       |              |     |     |

Continue on the next page

Light intensity and P interaction effect on Primary metabolites and/or related anaplerotic pathway metabolites to carbohydrates and amino acids of Longjing-43 cultivar measured by GC×GC-TOF/MS analysis (Data normalise to 1 based on treatment (FL+P) (*cont.*).

| Metabolites | Chemical Structure                                                                   | Mass | 1st Dim<br>Time<br>(Minutes) | 2nd Dim<br>Time<br>(Seconds) | CAS      | Organ  | P level | Light Intensity    |                      |                   | Significance |     |     |
|-------------|--------------------------------------------------------------------------------------|------|------------------------------|------------------------------|----------|--------|---------|--------------------|----------------------|-------------------|--------------|-----|-----|
|             |                                                                                      |      |                              |                              |          |        |         | Full<br>Light (FL) | Medium<br>Light (ML) | Low<br>Light (LL) | FL           | ML  | LL  |
| Citrulline  | 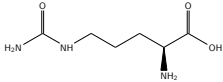   | 70   | 13.9                         | 2.23                         | 372-75-8 | YS     | +P      | 1 ± 0.06d          | 1.83 ± 0.02a         | 1.19 ± 0.04c      | ***          | *** | *** |
|             |                                                                                      |      |                              |                              |          |        | -P      | 0.93 ± 0.03d       | 1.37 ± 0.06b         | 0.74 ± 0.05e      |              |     |     |
|             |                                                                                      |      |                              |                              |          | Leaves | +P      | 1 ± 0.13a          | 0.46 ± 0.04d         | 0.85 ± 0.08b      | ***          | *** | *** |
|             |                                                                                      |      |                              |                              |          |        | -P      | 0.71 ± 0.05c       | 0.19 ± 0.01e         | 0.16 ± 0.01e      |              |     |     |
|             |                                                                                      |      |                              |                              |          | Roots  | +P      | 1 ± 0.21b          | 1.62 ± 0.25a         | 0.77 ± 0.1b       | ***          | *** | *** |
|             |                                                                                      |      |                              |                              |          |        | -P      | 0.03 ± 0.01c       | 0.02 ± 0c            | 0.07 ± 0c         |              |     |     |
| L-Arginine  |    | 179  | 23.6                         | 2.93                         | 74-79-3  | YS     | +P      | 1 ± 0.03d          | 2.01 ± 0.02a         | 1.31 ± 0.04c      | ***          | *** | *** |
|             |                                                                                      |      |                              |                              |          |        | -P      | 1.05 ± 0.08d       | 1.48 ± 0.07b         | 0.82 ± 0.05e      |              |     |     |
|             |                                                                                      |      |                              |                              |          | Leaves | +P      | 1 ± 0.03ab         | 0.75 ± 0c            | 0.68 ± 0.05c      | ***          | **  | *** |
|             |                                                                                      |      |                              |                              |          |        | -P      | 0.94 ± 0.03b       | 1.08 ± 0.07a         | 0.27 ± 0.07d      |              |     |     |
|             |                                                                                      |      |                              |                              |          | Roots  | +P      | 1 ± 0.02b          | 0.92 ± 0.01c         | 1.02 ± 0.01b      | ***          | *** | *** |
|             |                                                                                      |      |                              |                              |          |        | -P      | 1.04 ± 0.01ab      | 1.09 ± 0.06a         | 1.09 ± 0.02a      |              |     |     |
| Ornithine   |   | 69   | 15.8                         | 2.89                         | 70-26-8  | YS     | +P      | 1 ± 0.04d          | 1.63 ± 0.03a         | 1.09 ± 0.03c      | ***          | *** | *** |
|             |                                                                                      |      |                              |                              |          |        | -P      | 0.95 ± 0.03d       | 1.24 ± 0.07b         | 0.73 ± 0.05e      |              |     |     |
|             |                                                                                      |      |                              |                              |          | Leaves | +P      | 1 ± 0.03b          | 0.68 ± 0.02c         | 0.43 ± 0.07d      | ***          | *   | *** |
|             |                                                                                      |      |                              |                              |          |        | -P      | 0.72 ± 0.07c       | 1.26 ± 0.09a         | 0.02 ± 0.01e      |              |     |     |
|             |                                                                                      |      |                              |                              |          | Roots  | +P      | 1 ± 0.01ab         | 0.88 ± 0.01c         | 0.97 ± 0.01b      | ***          | *** | *** |
|             |                                                                                      |      |                              |                              |          |        | -P      | 0.96 ± 0.02b       | 1.04 ± 0.05a         | 1.04 ± 0.02a      |              |     |     |
| Chorismate  |  | 101  | 7.5                          | 1.69                         | 617-12-9 | YS     | +P      | 1 ± 0.06d          | 1.78 ± 0.02a         | 1.18 ± 0.03c      | ***          | *** | *** |
|             |                                                                                      |      |                              |                              |          |        | -P      | 0.9 ± 0.03e        | 1.47 ± 0.07b         | 0.67 ± 0.05f      |              |     |     |
|             |                                                                                      |      |                              |                              |          | Leaves | +P      | 1 ± 0.03b          | 0.68 ± 0.02c         | 0.44 ± 0.07d      | ***          | ns  | *** |
|             |                                                                                      |      |                              |                              |          |        | -P      | 0.73 ± 0.07c       | 1.26 ± 0.09a         | 0.04 ± 0.01e      |              |     |     |
|             |                                                                                      |      |                              |                              |          | Roots  | +P      | 1 ± 0.14ab         | 1.12 ± 0.16a         | 0.83 ± 0.05bc     | ***          | *** | *** |
|             |                                                                                      |      |                              |                              |          |        | -P      | 1.2 ± 0.21a        | 0.38 ± 0.03d         | 0.69 ± 0.12c      |              |     |     |

Continue on the next page

Light intensity and P interaction effect on Primary metabolites and/or related anaplerotic pathway metabolites to carbohydrates and amino acids of Longjing-43 cultivar measured by GC×GC-TOF/MS analysis (Data normalise to 1 based on treatment (FL+P) (*cont.*).

| Metabolites  | Chemical Structure                                                                   | Mass | 1st Dim<br>Time<br>(Minutes) | 2nd Dim<br>Time<br>(Seconds) | CAS        | Organ  | P level | Light Intensity    |                      |                   | Significance |     |     |
|--------------|--------------------------------------------------------------------------------------|------|------------------------------|------------------------------|------------|--------|---------|--------------------|----------------------|-------------------|--------------|-----|-----|
|              |                                                                                      |      |                              |                              |            |        |         | Full<br>Light (FL) | Medium<br>Light (ML) | Low<br>Light (LL) | FL           | ML  | LL  |
| Anthranilate | 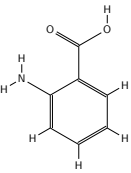   | 146  | 10.5                         | 1.72                         | 118-92-3   | YS     | +P      | 1 ± 0.06d          | 2.24 ± 0.04a         | 1.46 ± 0.04b      | ***          | *** | *** |
|              |                                                                                      |      |                              |                              |            |        | -P      | 1.05 ± 0.03d       | 1.28 ± 0.06c         | 0.8 ± 0.06e       |              |     |     |
|              |                                                                                      |      |                              |                              |            | Leaves | +P      | 1 ± 0.07bc         | 1.28 ± 0.31a         | 0.72 ± 0.06c      | ***          | **  | *   |
|              |                                                                                      |      |                              |                              |            |        | -P      | 0.91 ± 0.03c       | 1.25 ± 0.2ab         | 0.34 ± 0.09d      |              |     |     |
|              |                                                                                      |      |                              |                              |            | Roots  | +P      | 1 ± 0.18a          | 1.05 ± 0.07a         | 0.73 ± 0.05b      | ***          | *** | *** |
|              |                                                                                      |      |                              |                              |            |        | -P      | 1.11 ± 0.04a       | 0.21 ± 0.01d         | 0.54 ± 0.07c      |              |     |     |
| Prephenate   |    | 45   | 31.8                         | 4.38                         | 126-49-8   | YS     | +P      | 1 ± 0.03d          | 2.2 ± 0.04a          | 1.43 ± 0.04b      | ***          | *** | *** |
|              |                                                                                      |      |                              |                              |            |        | -P      | 0.95 ± 0.06d       | 1.25 ± 0.06c         | 0.74 ± 0.06e      |              |     |     |
|              |                                                                                      |      |                              |                              |            | Leaves | +P      | 1 ± 0.18a          | 0.16 ± 0d            | 0.63 ± 0.01c      | ***          | *** | *** |
|              |                                                                                      |      |                              |                              |            |        | -P      | 0.7 ± 0.04c        | 0.85 ± 0.09b         | 0.56 ± 0.03c      |              |     |     |
|              |                                                                                      |      |                              |                              |            | Roots  | +P      | 1 ± 0.08b          | 2 ± 0.08a            | 0.99 ± 0.02b      | ***          | *** | *** |
|              |                                                                                      |      |                              |                              |            |        | -P      | 0.09 ± 0.07cd      | 0.14 ± 0.03c         | 0.04 ± 0.01d      |              |     |     |
| L-Arogenate  |   | 218  | 19.3                         | 3.29                         | 53078-86-7 | YS     | +P      | 1 ± 0.05d          | 1.76 ± 0.02a         | 1.18 ± 0.04c      | ***          | *** | *** |
|              |                                                                                      |      |                              |                              |            |        | -P      | 0.91 ± 0.03e       | 1.48 ± 0.07b         | 0.69 ± 0.05f      |              |     |     |
|              |                                                                                      |      |                              |                              |            | Leaves | +P      | 1 ± 0.05a          | 0.92 ± 0.01b         | 0.77 ± 0.05c      | ***          | *** | *** |
|              |                                                                                      |      |                              |                              |            |        | -P      | 0.84 ± 0.02c       | 0.6 ± 0.03d          | 0.3 ± 0.06e       |              |     |     |
|              |                                                                                      |      |                              |                              |            | Roots  | +P      | 1 ± 0.03c          | 1.09 ± 0.03b         | 1.04 ± 0.03c      | ***          | *** | *** |
|              |                                                                                      |      |                              |                              |            |        | -P      | 0.91 ± 0.04d       | 1.17 ± 0.01a         | 0.94 ± 0.01d      |              |     |     |
| L-Theanine   |  | 46   | 19                           | 3.91                         | 3081-61-6  | YS     | +P      | 1 ± 0.04c          | 1.79 ± 0.02a         | 1.19 ± 0.03b      | ***          | *** | *** |
|              |                                                                                      |      |                              |                              |            |        | -P      | 0.96 ± 0.03c       | 1.25 ± 0.06b         | 0.73 ± 0.06d      |              |     |     |
|              |                                                                                      |      |                              |                              |            | Leaves | +P      | 1 ± 0.01a          | 0.91 ± 0.01b         | 0.54 ± 0.05c      | ***          | *** | *** |
|              |                                                                                      |      |                              |                              |            |        | -P      | 0.44 ± 0.03d       | 0.15 ± 0.05f         | 0.24 ± 0.06e      |              |     |     |
|              |                                                                                      |      |                              |                              |            | Roots  | +P      | 1 ± 0.08c          | 0.35 ± 0.1e          | 0.85 ± 0.05d      | ***          | *** | *** |
|              |                                                                                      |      |                              |                              |            |        | -P      | 1.56 ± 0.01a       | 1.66 ± 0.01a         | 1.38 ± 0.05b      |              |     |     |

Means with the different letter in the row of the same metabolites content are significantly different.  
(\*\*\*) 0.001 (\*\*) 0.01 (\*) 0.05 = significant differences, ns = non-significant differences, between light and P interaction.

Table S7. Identification of secondary metabolites measured by UPLC–Q–TOF/MS and ANOVA analysis in tea plant organs in response light effect, P effect and their interaction.

| Metabolites                       | Chemical Structure                                                                  | Mass          | RT   | Adduct               | Organ  | Plevel | Light Intensity    |                      |                   | Significance |     |     |
|-----------------------------------|-------------------------------------------------------------------------------------|---------------|------|----------------------|--------|--------|--------------------|----------------------|-------------------|--------------|-----|-----|
|                                   |                                                                                     |               |      |                      |        |        | Full<br>Light (FL) | Medium<br>Light (ML) | Low<br>Light (LL) | FL           | ML  | LL  |
| <i>p</i> –Coumaroyl shikimic acid | 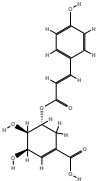   | 320.089602866 | 3.73 | M-H                  | YS     | +P     | 1 ± 0.15d          | 3.69 ± 0.87c         | 10.19 ± 0.45a     | ***          | *** | *** |
|                                   |                                                                                     |               |      |                      |        | -P     | 5.99 ± 0.36b       | 2.59 ± 0.97c         | 3.55 ± 0.79c      |              |     |     |
|                                   |                                                                                     |               |      |                      | Leaves | +P     | 1 ± 0.16b          | 2.19 ± 1.71b         | 2.01 ± 0.07b      | ***          | *** | *** |
|                                   |                                                                                     |               |      |                      |        | -P     | 5.04 ± 3.78b       | 11.94 ± 4.69a        | 1.25 ± 0.08b      |              |     |     |
|                                   |                                                                                     |               |      |                      | Roots  | +P     | 1 ± 0.07a          | 0.95 ± 0.04a         | 0.74 ± 0.05b      | ***          | *** | *** |
|                                   |                                                                                     |               |      |                      |        | -P     | 0.06 ± 0.01d       | 0.6 ± 0.08c          | 0.98 ± 0.11a      |              |     |     |
| <i>p</i> –Coumaroyl quinic acid   |    | 338.100167552 | 4.48 | M-H                  | YS     | +P     | 1 ± 0.14e          | 13.82 ± 0.44a        | 5.01 ± 1.13c      | ***          | *** | *** |
|                                   |                                                                                     |               |      |                      |        | -P     | 3.45 ± 0.45d       | 1.17 ± 0.82e         | 8.28 ± 1.33b      |              |     |     |
|                                   |                                                                                     |               |      |                      | Leaves | +P     | 1 ± 0.61c          | 43.88 ± 39.99ab      | 0.27 ± 0.03c      | ***          | **  | ns  |
|                                   |                                                                                     |               |      |                      |        | -P     | 24.9 ± 13.8abc     | 58.46 ± 14.26a       | 21.71 ± 20.82bc   |              |     |     |
|                                   |                                                                                     |               |      |                      | Roots  | +P     | 1 ± 0.02c          | 1.85 ± 0.27b         | 1.95 ± 0.18b      | ***          | ns  | *** |
|                                   |                                                                                     |               |      |                      |        | -P     | 0.27 ± 0.09d       | 3.18 ± 0.31a         | 0.93 ± 0.25c      |              |     |     |
| Caffeoyl shikimic acid            |   | 336.084517488 | 6.46 | M-H <sub>2</sub> O-H | YS     | +P     | 1 ± 0.21a          | 0.12 ± 0c            | 0.24 ± 0.05c      | ***          | *   | **  |
|                                   |                                                                                     |               |      |                      |        | -P     | 0.75 ± 0.06ab      | 0.44 ± 0.34bc        | 0.7 ± 0.46ab      |              |     |     |
|                                   |                                                                                     |               |      |                      | Leaves | +P     | 1 ± 0.21a          | 10.78 ± 14.27a       | 2.18 ± 0.08a      | *            | ns  | ns  |
|                                   |                                                                                     |               |      |                      |        | -P     | 0.28 ± 0.03a       | 7.09 ± 9.12a         | 1.42 ± 0.41a      |              |     |     |
|                                   |                                                                                     |               |      |                      | Roots  | +P     | 1 ± 0.13b          | 1.46 ± 0.11a         | 1.04 ± 0.09b      | ***          | *** | *** |
|                                   |                                                                                     |               |      |                      |        | -P     | 0.06 ± 0.03d       | 1.34 ± 0.13a         | 0.74 ± 0.07c      |              |     |     |
| Caffeoyl quinic acid              |  | 354.095082174 | 4.91 | M-H <sub>2</sub> O-H | YS     | +P     | 1 ± 0.1ab          | 0.24 ± 0e            | 0.44 ± 0.02d      | ***          | *** | *** |
|                                   |                                                                                     |               |      |                      |        | -P     | 0.62 ± 0.03c       | 0.87 ± 0.05b         | 1.09 ± 0.17a      |              |     |     |
|                                   |                                                                                     |               |      |                      | Leaves | +P     | 1 ± 0.19a          | 2.46 ± 2.59a         | 0.61 ± 0.02a      | **           | ns  | ns  |
|                                   |                                                                                     |               |      |                      |        | -P     | 2.57 ± 0.35a       | 2.87 ± 2.3a          | 0.5 ± 0.02a       |              |     |     |
|                                   |                                                                                     |               |      |                      | Roots  | +P     | 1 ± 0.16b          | 0.51 ± 0.03cd        | 0.66 ± 0.15c      | ***          | *** | ns  |
|                                   |                                                                                     |               |      |                      |        | -P     | 0.01 ± 0.01e       | 0.39 ± 0.08d         | 1.61 ± 0.19a      |              |     |     |

Continue on the next page

| Identification of secondary metabolites measured by UPLC–Q–TOF/MS and ANOVA analysis in tea plant organs in response light effect, P effect and their interaction ( <i>cont.</i> ). |                                                                                     |               |      |         |        |        |                    |                      |                   |              |     |     |
|-------------------------------------------------------------------------------------------------------------------------------------------------------------------------------------|-------------------------------------------------------------------------------------|---------------|------|---------|--------|--------|--------------------|----------------------|-------------------|--------------|-----|-----|
| Metabolites                                                                                                                                                                         | Chemical Structure                                                                  | Mass          | RT   | Adduct  | Organ  | Plevel | Light Intensity    |                      |                   | Significance |     |     |
|                                                                                                                                                                                     |                                                                                     |               |      |         |        |        | Full<br>Light (FL) | Medium<br>Light (ML) | Low<br>Light (LL) | FL           | ML  | LL  |
| Caffeoyl–CoA                                                                                                                                                                        | 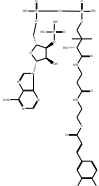   | 929.146902423 | 2.96 | M-H     | YS     | +P     | 1 ± 0.05e          | 4.8 ± 0.11d          | 9.21 ± 0.75c      | ***          | *** | *** |
|                                                                                                                                                                                     |                                                                                     |               |      |         |        | -P     | 2.5 ± 0.25e        | 11.35 ± 0.86b        | 16.14 ± 2.66a     |              |     |     |
|                                                                                                                                                                                     |                                                                                     |               |      |         | Leaves | +P     | 1 ± 0.27b          | 19.34 ± 18.84a       | 1.64 ± 0.26b      | *            | *   | ns  |
|                                                                                                                                                                                     |                                                                                     |               |      |         |        | -P     | 1.26 ± 0.98b       | 5.83 ± 2.48ab        | 8.94 ± 9.34ab     |              |     |     |
|                                                                                                                                                                                     |                                                                                     |               |      |         | Roots  | +P     | 1 ± 0.05b          | 1.16 ± 0.05b         | 1.3 ± 0.17b       | **           | *** | *** |
|                                                                                                                                                                                     |                                                                                     |               |      |         |        | -P     | 1.68 ± 0.15a       | 1.68 ± 0.12a         | 0.99 ± 0.37b      |              |     |     |
| Quercetin                                                                                                                                                                           |    | 448.100561482 | 3.32 | M-H     | YS     | +P     | 1 ± 0.23e          | 16.03 ± 0.75b        | 7.1 ± 1.43c       | ***          | *** | *   |
|                                                                                                                                                                                     |                                                                                     |               |      |         |        | -P     | 4.4 ± 0.71d        | 18.89 ± 1.96a        | 8.1 ± 0.53c       |              |     |     |
|                                                                                                                                                                                     |                                                                                     |               |      |         | Leaves | +P     | 1 ± 0.44c          | 1.95 ± 0.55c         | 2.45 ± 0.91bc     | *            | *** | *** |
|                                                                                                                                                                                     |                                                                                     |               |      |         |        | -P     | 4.78 ± 1.95a       | 4.38 ± 1.83ab        | 1.04 ± 0.05c      |              |     |     |
|                                                                                                                                                                                     |                                                                                     |               |      |         | Roots  | +P     | 1 ± 0.1cd          | 1.31 ± 0.12c         | 1.01 ± 0.11cd     | ***          | *** | *** |
|                                                                                                                                                                                     |                                                                                     |               |      |         |        | -P     | 0.71 ± 0.4d        | 1.77 ± 0.13b         | 2.15 ± 0.18a      |              |     |     |
| Isoquercetin                                                                                                                                                                        |    | 464.0954761   | 4.85 | M-H     | YS     | +P     | 1 ± 0.05b          | 0.21 ± 0.03e         | 0.77 ± 0.08c      | ***          | *** | *** |
|                                                                                                                                                                                     |                                                                                     |               |      |         |        | -P     | 1.17 ± 0.05a       | 0.65 ± 0.07d         | 1.08 ± 0.04ab     |              |     |     |
|                                                                                                                                                                                     |                                                                                     |               |      |         | Leaves | +P     | 1 ± 0.29c          | 1.09 ± 0.26c         | 1.55 ± 0.26b      | ***          | *** | ns  |
|                                                                                                                                                                                     |                                                                                     |               |      |         |        | -P     | 1.37 ± 0.19bc      | 0.37 ± 0.31d         | 1.99 ± 0.07a      |              |     |     |
|                                                                                                                                                                                     |                                                                                     |               |      |         | Roots  | +P     | 1 ± 0.1c           | 1.72 ± 0.09ab        | 1.01 ± 0.28c      | ***          | *** | **  |
|                                                                                                                                                                                     |                                                                                     |               |      |         |        | -P     | 1.2 ± 0.21c        | 1.94 ± 0.07a         | 1.62 ± 0.12b      |              |     |     |
| Rutin                                                                                                                                                                               |  | 610.1533849   | 4.5  | M-H2O-H | YS     | +P     | 1 ± 0.14b          | 3.78 ± 0.09a         | 1.43 ± 0.34b      | ***          | *   | *** |
|                                                                                                                                                                                     |                                                                                     |               |      |         |        | -P     | 0.46 ± 0.05b       | 0.11 ± 0.06b         | 3.76 ± 1.87a      |              |     |     |
|                                                                                                                                                                                     |                                                                                     |               |      |         | Leaves | +P     | 1 ± 0.15b          | 1.8 ± 0.76b          | 1.66 ± 0.06b      | ***          | *** | *** |
|                                                                                                                                                                                     |                                                                                     |               |      |         |        | -P     | 3.86 ± 0.15a       | 4.69 ± 1.46a         | 1.08 ± 0.04b      |              |     |     |
|                                                                                                                                                                                     |                                                                                     |               |      |         | Roots  | +P     | 1 ± 0.09d          | 3.65 ± 0.73b         | 2.24 ± 1.22c      | ***          | **  | *** |
|                                                                                                                                                                                     |                                                                                     |               |      |         |        | -P     |                    |                      |                   |              |     |     |

Continue on the next page

| Identification of secondary metabolites measured by UPLC–Q–TOF/MS and ANOVA analysis in tea plant organs in response light effect, P effect and their interaction ( <i>cont.</i> ). |                                                                                     |               |       |           |        |        |                    |                      |                   |              |     |     |
|-------------------------------------------------------------------------------------------------------------------------------------------------------------------------------------|-------------------------------------------------------------------------------------|---------------|-------|-----------|--------|--------|--------------------|----------------------|-------------------|--------------|-----|-----|
| Metabolites                                                                                                                                                                         | Chemical Structure                                                                  | Mass          | RT    | Adduct    | Organ  | Plevel | Light Intensity    |                      |                   | Significance |     |     |
|                                                                                                                                                                                     |                                                                                     |               |       |           |        |        | Full<br>Light (FL) | Medium<br>Light (ML) | Low<br>Light (LL) | FL           | ML  | LL  |
| Leucocyanidin                                                                                                                                                                       | 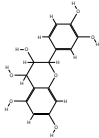   | 306.073952802 | 2.53  | M+FA+H    | YS     | -P     | 0.24 ± 0.02d       | 8.19 ± 0.87a         | 0.99 ± 0.36d      | ***          | *** | *** |
|                                                                                                                                                                                     |                                                                                     |               |       |           |        | +P     | 1 ± 0.08a          | 0.06 ± 0d            | 0.06 ± 0.01d      |              |     |     |
|                                                                                                                                                                                     |                                                                                     |               |       |           | Leaves | -P     | 0.51 ± 0.02b       | 0.46 ± 0.03b         | 0.38 ± 0.01c      | ns           | ns  | ns  |
|                                                                                                                                                                                     |                                                                                     |               |       |           |        | +P     | 1 ± 0.25a          | 3.02 ± 2.58a         | 0.93 ± 0.05a      |              |     |     |
|                                                                                                                                                                                     |                                                                                     |               |       |           | Roots  | -P     | 2.16 ± 0.36a       | 2.99 ± 4.28a         | 2.94 ± 0.02a      | ***          | *** | *** |
|                                                                                                                                                                                     |                                                                                     |               |       |           |        | +P     | 1 ± 0.07cd         | 1.94 ± 0.41b         | 1.58 ± 0.57bc     |              |     |     |
| Cyanidin                                                                                                                                                                            |    | 286.0477381   | 3.16  | 2H/M+FA-H | YS     | +P     | 1 ± 0.23b          | 0.01 ± 0d            | 0.26 ± 0.15c      | ***          | *** | *** |
|                                                                                                                                                                                     |                                                                                     |               |       |           |        | -P     | 1.29 ± 0.12a       | 0.22 ± 0.14cd        | 1.17 ± 0.07ab     |              |     |     |
|                                                                                                                                                                                     |                                                                                     |               |       |           | Leaves | +P     | 1 ± 0.29b          | 1.52 ± 0.36b         | 1.03 ± 0.02b      | ***          | *** | *** |
|                                                                                                                                                                                     |                                                                                     |               |       |           |        | -P     | 4.68 ± 0.29a       | 3.67 ± 2.15a         | 1.24 ± 0.17b      |              |     |     |
|                                                                                                                                                                                     |                                                                                     |               |       |           | Roots  | +P     | 1 ± 0.13a          | 0.91 ± 0.03a         | 0.97 ± 0.11a      | ***          | *** | *** |
|                                                                                                                                                                                     |                                                                                     |               |       |           |        | -P     | 0.04 ± 0.02b       | 1.04 ± 0.11a         | 0.15 ± 0.06b      |              |     |     |
| (+)–Catechin                                                                                                                                                                        |    | 289.0741      | 2.38  | M-H 2.26  | YS     | +P     | 1 ± 0.18b          | 0.04 ± 0c            | 0.04 ± 0.01c      | ***          | **  | **  |
|                                                                                                                                                                                     |                                                                                     |               |       |           |        | -P     | 1.5 ± 0.35a        | 0.06 ± 0.01c         | 0.09 ± 0.01c      |              |     |     |
|                                                                                                                                                                                     |                                                                                     |               |       |           | Leaves | +P     | 1 ± 0.17b          | 1.78 ± 0.72b         | 1.64 ± 0.06b      | ***          | *** | *** |
|                                                                                                                                                                                     |                                                                                     |               |       |           |        | -P     | 3.8 ± 0.26a        | 4.32 ± 1.62a         | 1.07 ± 0.04b      |              |     |     |
|                                                                                                                                                                                     |                                                                                     |               |       |           | Roots  | +P     | 1 ± 0.09b          | 1.61 ± 0.04a         | 1.17 ± 0.18b      | ***          | *** | *** |
|                                                                                                                                                                                     |                                                                                     |               |       |           |        | -P     | 0.68 ± 0.04c       | 1.54 ± 0.1a          | 0.54 ± 0.07c      |              |     |     |
| Cyanidin 3–glucoside                                                                                                                                                                |  | 448.100561482 | 11.66 | M-H       | YS     | +P     | 1 ± 0.14bc         | 1.71 ± 0.07a         | 0.73 ± 0.09c      | *            | **  | *** |
|                                                                                                                                                                                     |                                                                                     |               |       |           |        | -P     | 0.79 ± 0.1bc       | 0.66 ± 0.53c         | 1.19 ± 0.18b      |              |     |     |
|                                                                                                                                                                                     |                                                                                     |               |       |           | Leaves | +P     | 1 ± 0.07ab         | 1.1 ± 0.41a          | 0.28 ± 0.06c      | *            | *** | ns  |
|                                                                                                                                                                                     |                                                                                     |               |       |           |        | -P     | 0.64 ± 0.12abc     | 0.52 ± 0.55bc        | 0.81 ± 0.07ab     |              |     |     |
|                                                                                                                                                                                     |                                                                                     |               |       |           | Roots  | +P     | 1 ± 0.16ab         | 1.15 ± 0.13a         | 0.83 ± 0.15bc     | ***          | *** | *** |
|                                                                                                                                                                                     |                                                                                     |               |       |           |        | -P     | 0.07 ± 0.02e       | 0.61 ± 0.07d         | 0.67 ± 0.04cd     |              |     |     |

Continue on the next page



| Identification of secondary metabolites measured by UPLC–Q–TOF/MS and ANOVA analysis in tea plant organs in response light effect, P effect and their interaction ( <i>cont.</i> ). |                                                                                     |               |      |         |        |        |                    |                      |                   |              |     |     |
|-------------------------------------------------------------------------------------------------------------------------------------------------------------------------------------|-------------------------------------------------------------------------------------|---------------|------|---------|--------|--------|--------------------|----------------------|-------------------|--------------|-----|-----|
| Metabolites                                                                                                                                                                         | Chemical Structure                                                                  | Mass          | RT   | Adduct  | Organ  | Plevel | Light Intensity    |                      |                   | Significance |     |     |
|                                                                                                                                                                                     |                                                                                     |               |      |         |        |        | Full<br>Light (FL) | Medium<br>Light (ML) | Low<br>Light (LL) | FL           | ML  | LL  |
| Cyanidin 3–rutinoside                                                                                                                                                               | 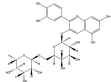   | 204           | 21.5 | 2.26    | YS     | +P     | 1 ± 0.22a          | 0.14 ± 0.01c         | 0.12 ± 0.01c      | ***          | *** | **  |
|                                                                                                                                                                                     |                                                                                     |               |      |         |        | -P     | 0.71 ± 0.07b       | 0.04 ± 0.04c         | 0.14 ± 0.04c      |              |     |     |
|                                                                                                                                                                                     |                                                                                     |               |      |         | Leaves | +P     | 1 ± 0.02bc         | 1.48 ± 0.96bc        | 0.58 ± 0.03c      | ***          | *** | *** |
|                                                                                                                                                                                     |                                                                                     |               |      |         |        | -P     | 2.43 ± 1.73b       | 6.54 ± 1.57a         | 0.63 ± 0.06bc     |              |     |     |
|                                                                                                                                                                                     |                                                                                     |               |      |         | Roots  | +P     | 1 ± 0.08b          | 1.53 ± 0.07a         | 0.91 ± 0.17b      | ***          | *** | *** |
|                                                                                                                                                                                     |                                                                                     |               |      |         |        | -P     | 0.15 ± 0.01c       | 1.46 ± 0.14a         | 0.83 ± 0.04b      |              |     |     |
| Procyanidin B1                                                                                                                                                                      |    | 578.1424263   | 2.62 | M-H2O-H | YS     | +P     | 1 ± 0.02a          | 0.53 ± 0.29bc        | 0.36 ± 0.04cd     | ***          | *** | *   |
|                                                                                                                                                                                     |                                                                                     |               |      |         |        | -P     | 0.66 ± 0.03b       | 0.1 ± 0.02e          | 0.24 ± 0.05de     |              |     |     |
|                                                                                                                                                                                     |                                                                                     |               |      |         | Leaves | +P     | 1 ± 0.59ab         | 4.93 ± 6.04a         | 0.43 ± 0.02b      | **           | ns  | ns  |
|                                                                                                                                                                                     |                                                                                     |               |      |         |        | -P     | 4.55 ± 1.09ab      | 0.82 ± 1.02ab        | 3.27 ± 0.01ab     |              |     |     |
|                                                                                                                                                                                     |                                                                                     |               |      |         | Roots  | +P     | 1 ± 0.08e          | 0.62 ± 0.16f         | 1.53 ± 0.11d      | ***          | *** | *** |
|                                                                                                                                                                                     |                                                                                     |               |      |         |        | -P     | 3.69 ± 0.17a       | 1.89 ± 0.2c          | 2.51 ± 0.03b      |              |     |     |
| (-)-Epicatechin                                                                                                                                                                     |    | 290.07903818  | 3.32 | M-H2O-H | YS     | +P     | 1 ± 0.23a          | 0.04 ± 0c            | 0.02 ± 0c         | ***          | **  | *** |
|                                                                                                                                                                                     |                                                                                     |               |      |         |        | -P     | 0.67 ± 0.12b       | 0.01 ± 0.01c         | 0.02 ± 0c         |              |     |     |
|                                                                                                                                                                                     |                                                                                     |               |      |         | Leaves | +P     | 1 ± 0.06bc         | 1.46 ± 0.85b         | 0.59 ± 0.02cd     | ***          | **  | *** |
|                                                                                                                                                                                     |                                                                                     |               |      |         |        | -P     | 0.1 ± 0.07d        | 0.18 ± 0.14d         | 3.92 ± 0.04a      |              |     |     |
|                                                                                                                                                                                     |                                                                                     |               |      |         | Roots  | +P     | 1 ± 0.07b          | 0.94 ± 0.04bc        | 0.84 ± 0.07c      | ***          | **  | *** |
|                                                                                                                                                                                     |                                                                                     |               |      |         |        | -P     | 0.79 ± 0.12c       | 0.62 ± 0.07d         | 1.67 ± 0.12a      |              |     |     |
| Myricetin                                                                                                                                                                           |  | 318.037567296 | 4.4  | M+FA-H  | YS     | +P     | 1 ± 0.27c          | 3.33 ± 0.71a         | 3.43 ± 0.43a      | ***          | *** | *** |
|                                                                                                                                                                                     |                                                                                     |               |      |         |        | -P     | 2.39 ± 0.25b       | 0 ± 0d               | 1.8 ± 0.48b       |              |     |     |
|                                                                                                                                                                                     |                                                                                     |               |      |         | Leaves | +P     | 1 ± 0.94ab         | 0.46 ± 0.24bc        | 1.87 ± 0.79a      | ***          | *** | ns  |
|                                                                                                                                                                                     |                                                                                     |               |      |         |        | -P     | 0.21 ± 0.05bc      | 0.03 ± 0.01c         | 0.64 ± 0.19bc     |              |     |     |
|                                                                                                                                                                                     |                                                                                     |               |      |         | Roots  | +P     | 1 ± 0.01bc         | 1.34 ± 0.25b         | 1.12 ± 0.37bc     | ***          | *** | *** |
|                                                                                                                                                                                     |                                                                                     |               |      |         |        | -P     | 0.78 ± 0.05cd      | 2.89 ± 0.24a         | 0.57 ± 0.11d      |              |     |     |

Continue on the next page

| Identification of secondary metabolites measured by UPLC–Q–TOF/MS and ANOVA analysis in tea plant organs in response light effect, P effect and their interaction ( <i>cont.</i> ). |                                                                                     |               |      |         |        |        |                    |                      |                   |              |     |     |
|-------------------------------------------------------------------------------------------------------------------------------------------------------------------------------------|-------------------------------------------------------------------------------------|---------------|------|---------|--------|--------|--------------------|----------------------|-------------------|--------------|-----|-----|
| Metabolites                                                                                                                                                                         | Chemical Structure                                                                  | Mass          | RT   | Adduct  | Organ  | Plevel | Light Intensity    |                      |                   | Significance |     |     |
|                                                                                                                                                                                     |                                                                                     |               |      |         |        |        | Full<br>Light (FL) | Medium<br>Light (ML) | Low<br>Light (LL) | FL           | ML  | LL  |
| Leucodelphinidin                                                                                                                                                                    | 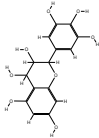   | 322.068867424 | 2.53 | M+FA-H  | YS     | +P     | 1 ± 0.09a          | 0.64 ± 0.02c         | 0.43 ± 0.02d      | ***          | *   | *** |
|                                                                                                                                                                                     |                                                                                     |               |      |         |        | -P     | 0.65 ± 0.01c       | 0.81 ± 0.07b         | 0.74 ± 0.08bc     |              |     |     |
|                                                                                                                                                                                     |                                                                                     |               |      |         | Leaves | +P     | 1 ± 0.12c          | 1.86 ± 0.57abc       | 1.69 ± 0.07bc     | *            | **  | *** |
|                                                                                                                                                                                     |                                                                                     |               |      |         |        | -P     | 2.19 ± 0.37ab      | 1.28 ± 1.21bc        | 2.74 ± 0.05a      |              |     |     |
|                                                                                                                                                                                     |                                                                                     |               |      |         | Roots  | +P     | 1 ± 0.07c          | 1.93 ± 0.11a         | 0.95 ± 0.2c       | ***          | *** | *** |
|                                                                                                                                                                                     |                                                                                     |               |      |         |        | -P     | 0.17 ± 0.03d       | 1.26 ± 0.12b         | 1.05 ± 0.09c      |              |     |     |
| Delphinidin                                                                                                                                                                         |    | 337.0149      | 3.9  | M-H     | YS     | +P     | 1 ± 0.15b          | 0.19 ± 0.02c         | 0.15 ± 0.03c      | ***          | *** | **  |
|                                                                                                                                                                                     |                                                                                     |               |      |         |        | -P     | 2.36 ± 0.34a       | 0.59 ± 0.26bc        | 0.79 ± 0.56b      |              |     |     |
|                                                                                                                                                                                     |                                                                                     |               |      |         | Leaves | +P     | 1 ± 0.9ab          | 0.3 ± 0.34bc         | 1.9 ± 0.83a       | ***          | **  | *   |
|                                                                                                                                                                                     |                                                                                     |               |      |         |        | -P     | 0.98 ± 0.23ab      | 0.01 ± 0.01c         | 0.59 ± 0.34bc     |              |     |     |
|                                                                                                                                                                                     |                                                                                     |               |      |         | Roots  | +P     | 1 ± 0.02e          | 2.32 ± 0.5c          | 1.48 ± 0.94de     | ***          | *** | *** |
|                                                                                                                                                                                     |                                                                                     |               |      |         |        | -P     | 4.07 ± 0.11b       | 5.45 ± 0.12a         | 2.23 ± 0.2cd      |              |     |     |
| (+)–Gallocatechin                                                                                                                                                                   |    | 306.0739528   | 2.04 | M-H2O-H | YS     | +P     | 1 ± 0.06a          | 0.44 ± 0.01d         | 0.21 ± 0.01e      | ***          | *** | ns  |
|                                                                                                                                                                                     |                                                                                     |               |      |         |        | -P     | 0.63 ± 0.03b       | 0.52 ± 0.02c         | 0.5 ± 0.01c       |              |     |     |
|                                                                                                                                                                                     |                                                                                     |               |      |         | Leaves | +P     | 1 ± 0.58b          | 1 ± 0.18b            | 2.08 ± 0.58a      | ***          | *** | ns  |
|                                                                                                                                                                                     |                                                                                     |               |      |         |        | -P     | 0.19 ± 0.07c       | 0.51 ± 0.65bc        | 0.77 ± 0.18bc     |              |     |     |
|                                                                                                                                                                                     |                                                                                     |               |      |         | Roots  | +P     | 1 ± 0.03a          | 0.76 ± 0.05b         | 0.72 ± 0.08b      | ***          | *** | *** |
|                                                                                                                                                                                     |                                                                                     |               |      |         |        | -P     | 0.03 ± 0.01e       | 0.47 ± 0.05c         | 0.34 ± 0.02d      |              |     |     |
| Delphinidin 3–glucoside                                                                                                                                                             |  | 464.095476104 | 4.86 | M-H2O-H | YS     | +P     | 1 ± 0.22a          | 0.09 ± 0c            | 0.1 ± 0c          | ***          | **  | **  |
|                                                                                                                                                                                     |                                                                                     |               |      |         |        | -P     | 0.7 ± 0.07b        | 0.04 ± 0.04c         | 0.12 ± 0.05c      |              |     |     |
|                                                                                                                                                                                     |                                                                                     |               |      |         | Leaves | +P     | 1 ± 0.04c          | 6.29 ± 2.7b          | 0.45 ± 0.04c      | ***          | *** | *** |
|                                                                                                                                                                                     |                                                                                     |               |      |         |        | -P     | 0.52 ± 0.32c       | 0.26 ± 0.22c         | 16.64 ± 0.72a     |              |     |     |
|                                                                                                                                                                                     |                                                                                     |               |      |         | Roots  | +P     | 1 ± 0.11ab         | 1.11 ± 0.09a         | 0.68 ± 0.03c      | ***          | *** | *** |
|                                                                                                                                                                                     |                                                                                     |               |      |         |        | -P     | 0.16 ± 0.03e       | 0.48 ± 0.04d         | 0.98 ± 0.1b       |              |     |     |

Continue on the next page

| Identification of secondary metabolites measured by UPLC–Q–TOF/MS and ANOVA analysis in tea plant organs in response light effect, P effect and their interaction ( <i>cont.</i> ). |                                                                                     |                        |      |             |        |        |                    |                      |                   |              |     |     |
|-------------------------------------------------------------------------------------------------------------------------------------------------------------------------------------|-------------------------------------------------------------------------------------|------------------------|------|-------------|--------|--------|--------------------|----------------------|-------------------|--------------|-----|-----|
| Metabolites                                                                                                                                                                         | Chemical Structure                                                                  | Mass                   | RT   | Adduct      | Organ  | Plevel | Light Intensity    |                      |                   | Significance |     |     |
|                                                                                                                                                                                     |                                                                                     |                        |      |             |        |        | Full<br>Light (FL) | Medium<br>Light (ML) | Low<br>Light (LL) | FL           | ML  | LL  |
| (-)-Epigallocatechin                                                                                                                                                                | 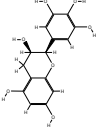   | 306.0739528            | 2.72 | M+FA-H      | YS     | +P     | 1 ± 0.22a          | 0.08 ± 0.01d         | 0.25 ± 0.01c      | ***          | *** | ns  |
|                                                                                                                                                                                     |                                                                                     |                        |      |             |        | -P     | 0.78 ± 0.06b       | 0.04 ± 0d            | 0.05 ± 0.03d      |              |     |     |
|                                                                                                                                                                                     |                                                                                     |                        |      |             | Leaves | +P     | 1 ± 0.7ab          | 0.81 ± 0.36abc       | 1.4 ± 0.61a       | *            | *** | ns  |
|                                                                                                                                                                                     |                                                                                     |                        |      |             |        | -P     | 0.12 ± 0.05c       | 0.32 ± 0.16bc        | 0.66 ± 0.12bc     |              |     |     |
|                                                                                                                                                                                     |                                                                                     |                        |      |             | Roots  | +P     | 1 ± 0.12b          | 2.35 ± 0.21a         | 0.85 ± 0.26b      | ***          | *** | *** |
|                                                                                                                                                                                     |                                                                                     |                        |      |             |        | -P     | 0.02 ± 0c          | 0.86 ± 0.09b         | 0.28 ± 0.04c      |              |     |     |
| Kaempferol                                                                                                                                                                          |    | 286.047738052          | 3.34 | M-H         | YS     | +P     | 1 ± 0.19a          | 0.02 ± 0d            | 0.01 ± 0d         | ***          | *** | ns  |
|                                                                                                                                                                                     |                                                                                     |                        |      |             |        | -P     | 0.42 ± 0.02b       | 0.32 ± 0.01bc        | 0.28 ± 0.02c      |              |     |     |
|                                                                                                                                                                                     |                                                                                     |                        |      |             | Leaves | +P     | 1 ± 0.5bc          | 1.25 ± 0.16abc       | 1.5 ± 0.4ab       | *            | *** | ns  |
|                                                                                                                                                                                     |                                                                                     |                        |      |             |        | -P     | 1.75 ± 0.27a       | 0.81 ± 0.33c         | 0.71 ± 0.04c      |              |     |     |
|                                                                                                                                                                                     |                                                                                     |                        |      |             | Roots  | +P     | 1 ± 0.14b          | 0.51 ± 0.01d         | 0.74 ± 0.12c      | ***          | *** | ns  |
|                                                                                                                                                                                     |                                                                                     |                        |      |             |        | -P     | 0.09 ± 0e          | 0.35 ± 0.03d         | 1.64 ± 0.18a      |              |     |     |
| Malvidin                                                                                                                                                                            |    | 330.047/ 366.050630541 | 0.81 | M-H/M-H2O-H | YS     | +P     | 1 ± 0b             | 0.01 ± 0e            | 0.12 ± 0.01de     | ***          | *** | *** |
|                                                                                                                                                                                     |                                                                                     |                        |      |             |        | -P     | 1.87 ± 0a          | 0.17 ± 0.01cd        | 0.24 ± 0.17c      |              |     |     |
|                                                                                                                                                                                     |                                                                                     |                        |      |             | Leaves | +P     | 1 ± 0.35ab         | 0.9 ± 0.14ab         | 1.29 ± 0.32a      | ns           | *** | ns  |
|                                                                                                                                                                                     |                                                                                     |                        |      |             |        | -P     | 0.47 ± 0.08c       | 0.67 ± 0.28bc        | 0.62 ± 0.09bc     |              |     |     |
|                                                                                                                                                                                     |                                                                                     |                        |      |             | Roots  | +P     | 1 ± 0.1d           | 0.53 ± 0.1e          | 1.23 ± 0.09c      | ***          | *** | *** |
|                                                                                                                                                                                     |                                                                                     |                        |      |             |        | -P     | 2.07 ± 0.08b       | 1.29 ± 0.09c         | 2.33 ± 0.09a      |              |     |     |
| Luteolin                                                                                                                                                                            |  | 286.047738052          | 2.85 | M-H         | YS     | +P     | 1 ± 0.13a          | 0.01 ± 0c            | 0.02 ± 0c         | ***          | *** | *** |
|                                                                                                                                                                                     |                                                                                     |                        |      |             |        | -P     | 0.6 ± 0.07b        | 0.02 ± 0c            | 0.01 ± 0c         |              |     |     |
|                                                                                                                                                                                     |                                                                                     |                        |      |             | Leaves | +P     | 1 ± 0ab            | 1.29 ± 1.32a         | 0.15 ± 0.06b      | ns           | *** | *   |
|                                                                                                                                                                                     |                                                                                     |                        |      |             |        | -P     | 0.07 ± 0.04b       | 0.12 ± 0.1b          | 0.29 ± 0.03b      |              |     |     |
|                                                                                                                                                                                     |                                                                                     |                        |      |             | Roots  | +P     | 1 ± 0.04a          | 0.94 ± 0.04a         | 0.69 ± 0.06b      | ***          | *** | *** |
|                                                                                                                                                                                     |                                                                                     |                        |      |             |        | -P     | 0.27 ± 0.15c       | 0.62 ± 0.05b         | 0.95 ± 0.1a       |              |     |     |

Continue on the next page

| Identification of secondary metabolites measured by UPLC–Q–TOF/MS and ANOVA analysis in tea plant organs in response light effect, P effect and their interaction ( <i>cont.</i> ). |                                                                                     |              |      |        |        |        |                    |                      |                   |              |     |     |
|-------------------------------------------------------------------------------------------------------------------------------------------------------------------------------------|-------------------------------------------------------------------------------------|--------------|------|--------|--------|--------|--------------------|----------------------|-------------------|--------------|-----|-----|
| Metabolites                                                                                                                                                                         | Chemical Structure                                                                  | Mass         | RT   | Adduct | Organ  | Plevel | Light Intensity    |                      |                   | Significance |     |     |
|                                                                                                                                                                                     |                                                                                     |              |      |        |        |        | Full<br>Light (FL) | Medium<br>Light (ML) | Low<br>Light (LL) | FL           | ML  | LL  |
| Apigenin                                                                                                                                                                            | 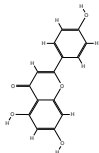   | 270.05282343 | 3.64 | 3.64   | YS     | +P     | 1 ± 0.13a          | 0.07 ± 0c            | 0.06 ± 0c         | ***          | *** | *** |
|                                                                                                                                                                                     |                                                                                     |              |      |        |        | -P     | 0.6 ± 0.07b        | 0.01 ± 0c            | 0.04 ± 0c         |              |     |     |
|                                                                                                                                                                                     |                                                                                     |              |      |        | Leaves | +P     | 1 ± 0.02ab         | 0.77 ± 0.39abc       | 0.15 ± 0.06c      | ***          | **  | ns  |
|                                                                                                                                                                                     |                                                                                     |              |      |        |        | -P     | 0.49 ± 0.29bc      | 1.24 ± 0.78a         | 0.43 ± 0.03bc     |              |     |     |
|                                                                                                                                                                                     |                                                                                     |              |      |        | Roots  | +P     | 1 ± 0.01b          | 1.52 ± 0.07a         | 0.8 ± 0.1c        | ***          | *** | *** |
|                                                                                                                                                                                     |                                                                                     |              |      |        |        | -P     | 0.12 ± 0.02d       | 0.87 ± 0.09c         | 0.76 ± 0.07c      |              |     |     |
| Luteolin 7–O glucoside                                                                                                                                                              |    | 462.07982604 | 3.7  | M+FA-H | YS     | +P     | 1 ± 0.22c          | 4.83 ± 0.47a         | 1.51 ± 0.37c      | ***          | *** | *** |
|                                                                                                                                                                                     |                                                                                     |              |      |        |        | -P     | 1.53 ± 0.17c       | 0.04 ± 0d            | 2.68 ± 0.43b      |              |     |     |
|                                                                                                                                                                                     |                                                                                     |              |      |        | Leaves | +P     | 1 ± 0.37b          | 0.51 ± 0.1c          | 2.07 ± 0.11a      | ***          | *** | *** |
|                                                                                                                                                                                     |                                                                                     |              |      |        |        | -P     | 0.06 ± 0.04d       | 0.27 ± 0.37cd        | 0.6 ± 0.21bc      |              |     |     |
|                                                                                                                                                                                     |                                                                                     |              |      |        | Roots  | +P     | 1 ± 0.13b          | 1.86 ± 0.16a         | 0.73 ± 0.14c      | ***          | *** | *** |
|                                                                                                                                                                                     |                                                                                     |              |      |        |        | -P     | 0.2 ± 0.09d        | 0.64 ± 0.04c         | 0.38 ± 0.02d      |              |     |     |
| Tricin 7–glucuronide                                                                                                                                                                |    | 1034.217561  | 3.83 | M-H    | YS     | +P     | 1 ± 0.16b          | 0.19 ± 0.12cd        | 1.13 ± 0.06ab     | ***          | *** | *** |
|                                                                                                                                                                                     |                                                                                     |              |      |        |        | -P     | 1.21 ± 0.11a       | 0.01 ± 0.01d         | 0.22 ± 0.13c      |              |     |     |
|                                                                                                                                                                                     |                                                                                     |              |      |        | Leaves | +P     | 1 ± 0.02a          | 0.9 ± 0.25a          | 0.52 ± 0.04bc     | ***          | *** | ns  |
|                                                                                                                                                                                     |                                                                                     |              |      |        |        | -P     | 0.44 ± 0.08c       | 0.32 ± 0.32c         | 0.79 ± 0.01ab     |              |     |     |
|                                                                                                                                                                                     |                                                                                     |              |      |        | Roots  | +P     | 1 ± 0.01bc         | 1.41 ± 0.27b         | 1.17 ± 0.42bc     | ***          | *** | *** |
|                                                                                                                                                                                     |                                                                                     |              |      |        |        | -P     | 0.85 ± 0.05cd      | 3.13 ± 0.26a         | 0.47 ± 0.13d      |              |     |     |
| Shikimic acid                                                                                                                                                                       |  | 174.0528234  | 3.43 | M-H    | YS     | +P     | 1 ± 0.12e          | 12.06 ± 0.65c        | 17.13 ± 0.36b     | ***          | *** | *** |
|                                                                                                                                                                                     |                                                                                     |              |      |        |        | -P     | 8.84 ± 0.29d       | 12.84 ± 0.46c        | 21.74 ± 1.69a     |              |     |     |
|                                                                                                                                                                                     |                                                                                     |              |      |        | Leaves | +P     | 1 ± 0.04a          | 0.78 ± 0.22ab        | 0.23 ± 0.09c      | ***          | *** | *** |
|                                                                                                                                                                                     |                                                                                     |              |      |        |        | -P     | 0.37 ± 0.08c       | 0.14 ± 0.24c         | 0.68 ± 0.03b      |              |     |     |
|                                                                                                                                                                                     |                                                                                     |              |      |        | Roots  | +P     | 1 ± 0.13c          | 0.49 ± 0.08d         | 1.09 ± 0.11c      | ***          | *** | *** |
|                                                                                                                                                                                     |                                                                                     |              |      |        |        | -P     | 1.33 ± 0.04b       | 1.02 ± 0.05c         | 2.25 ± 0.13a      |              |     |     |

Continue on the next page

| Identification of secondary metabolites measured by UPLC–Q–TOF/MS and ANOVA analysis in tea plant organs in response light effect, P effect and their interaction ( <i>cont.</i> ). |                                                                                     |             |      |         |        |        |                    |                      |                   |              |     |     |
|-------------------------------------------------------------------------------------------------------------------------------------------------------------------------------------|-------------------------------------------------------------------------------------|-------------|------|---------|--------|--------|--------------------|----------------------|-------------------|--------------|-----|-----|
| Metabolites                                                                                                                                                                         | Chemical Structure                                                                  | Mass        | RT   | Adduct  | Organ  | Plevel | Light Intensity    |                      |                   | Significance |     |     |
|                                                                                                                                                                                     |                                                                                     |             |      |         |        |        | Full<br>Light (FL) | Medium<br>Light (ML) | Low<br>Light (LL) | FL           | ML  | LL  |
| m–trigallic acid                                                                                                                                                                    | 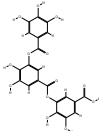   | 474.0434405 | 3.32 | M-H2O-H | YS     | +P     | 1 ± 0.07c          | 0.71 ± 0.02d         | 1.55 ± 0.14b      | ***          | *** | *** |
|                                                                                                                                                                                     |                                                                                     |             |      |         |        | -P     | 0.36 ± 0.03e       | 0.96 ± 0.03c         | 6.4 ± 0.29a       |              |     |     |
|                                                                                                                                                                                     |                                                                                     |             |      |         | Leaves | +P     | 1 ± 0.28b          | 0.65 ± 0.32bc        | 0.34 ± 0.13c      | ***          | **  | *** |
|                                                                                                                                                                                     |                                                                                     |             |      |         |        | -P     | 2.05 ± 0.27a       | 0.38 ± 0.08c         | 0.29 ± 0.04c      |              |     |     |
|                                                                                                                                                                                     |                                                                                     |             |      |         | Roots  | +P     | 1 ± 0.04b          | 1.4 ± 0.09a          | 0.77 ± 0.06c      | ***          | *** | *** |
|                                                                                                                                                                                     |                                                                                     |             |      |         |        | -P     | 0.26 ± 0.06e       | 0.63 ± 0.05d         | 0.98 ± 0.08b      |              |     |     |
| quinic acid                                                                                                                                                                         |    | 192.0633881 | 0.81 | M-H2O-H | YS     | +P     | 1 ± 0.31d          | 50.73 ± 5.6a         | 42.71 ± 16.68a    | ***          | *   | *** |
|                                                                                                                                                                                     |                                                                                     |             |      |         |        | -P     | 21.11 ± 7.03bc     | 12.31 ± 9.1cd        | 36.49 ± 16.06ab   |              |     |     |
|                                                                                                                                                                                     |                                                                                     |             |      |         | Leaves | +P     | 1 ± 0.39ab         | 0.8 ± 0.11ab         | 1.25 ± 0.35a      | **           | *** | ns  |
|                                                                                                                                                                                     |                                                                                     |             |      |         |        | -P     | 0.07 ± 0.06d       | 0.24 ± 0.4cd         | 0.57 ± 0.1bc      |              |     |     |
|                                                                                                                                                                                     |                                                                                     |             |      |         | Roots  | +P     | 1 ± 0.18bc         | 0.64 ± 0.1d          | 0.75 ± 0.16cd     | ***          | **  | *** |
|                                                                                                                                                                                     |                                                                                     |             |      |         |        | -P     | 0.01 ± 0e          | 1.03 ± 0.21b         | 1.91 ± 0.21a      |              |     |     |
| 2,4-hydrobenzoic acid                                                                                                                                                               |    | 154.0266087 | 3.31 | M-H2O-H | YS     | +P     | 1 ± 0.15c          | 7.7 ± 2.21a          | 3.81 ± 1.14b      | ***          | *** | *** |
|                                                                                                                                                                                     |                                                                                     |             |      |         |        | -P     | 2.39 ± 0.67bc      | 0.43 ± 0.26c         | 4.04 ± 1.63b      |              |     |     |
|                                                                                                                                                                                     |                                                                                     |             |      |         | Leaves | +P     | 1 ± 0.7ab          | 1.1 ± 0.2ab          | 1.97 ± 0.92a      | *            | *** | ns  |
|                                                                                                                                                                                     |                                                                                     |             |      |         |        | -P     | 0.13 ± 0.09b       | 0.53 ± 0.85b         | 0.53 ± 0.08b      |              |     |     |
|                                                                                                                                                                                     |                                                                                     |             |      |         | Roots  | +P     | 1 ± 0.09cd         | 2 ± 0.17a            | 0.79 ± 0.17d      | ***          | *** | ns  |
|                                                                                                                                                                                     |                                                                                     |             |      |         |        | -P     | 1.64 ± 0.07b       | 0.82 ± 0.1d          | 1.14 ± 0.11c      |              |     |     |
| 4'–methylchalcone                                                                                                                                                                   |  | 534.1502    | 2.62 | M-H2O-H | YS     | +P     | 1 ± 0.09c          | 39.54 ± 18.01a       | 22.89 ± 7.3ab     | **           | **  | *** |
|                                                                                                                                                                                     |                                                                                     |             |      |         |        | -P     | 12.11 ± 4.36bc     | 0.13 ± 0.01c         | 19.96 ± 12.84b    |              |     |     |
|                                                                                                                                                                                     |                                                                                     |             |      |         | Leaves | +P     | 1 ± 0.26ab         | 0.7 ± 0.14bc         | 1.13 ± 0.33a      | ***          | *** | ns  |
|                                                                                                                                                                                     |                                                                                     |             |      |         |        | -P     | 0.06 ± 0.04d       | 0.09 ± 0.12d         | 0.39 ± 0.03cd     |              |     |     |
|                                                                                                                                                                                     |                                                                                     |             |      |         | Roots  | +P     | 1 ± 0.14b          | 1.65 ± 0.17a         | 0.7 ± 0.1c        | ***          | *** | *** |
|                                                                                                                                                                                     |                                                                                     |             |      |         |        | -P     | 0.1 ± 0e           | 0.42 ± 0.04d         | 0.08 ± 0.03e      |              |     |     |

Continue on the next page

| Identification of secondary metabolites measured by UPLC–Q–TOF/MS and ANOVA analysis in tea plant organs in response light effect, P effect and their interaction ( <i>cont.</i> ). |                                                                                     |               |      |         |        |        |                    |                      |                   |              |     |     |
|-------------------------------------------------------------------------------------------------------------------------------------------------------------------------------------|-------------------------------------------------------------------------------------|---------------|------|---------|--------|--------|--------------------|----------------------|-------------------|--------------|-----|-----|
| Metabolites                                                                                                                                                                         | Chemical Structure                                                                  | Mass          | RT   | Adduct  | Organ  | Plevel | Light Intensity    |                      |                   | Significance |     |     |
|                                                                                                                                                                                     |                                                                                     |               |      |         |        |        | Full<br>Light (FL) | Medium<br>Light (ML) | Low<br>Light (LL) | FL           | ML  | LL  |
| 4,2',4',alpha-tetra-hydroxydihydrochalcone                                                                                                                                          | 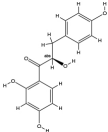   | 274.0841236   | 4.13 | M+Na-2H | YS     | +P     | 1 ± 0.06d          | 3.59 ± 0.25c         | 22.11 ± 1.28a     | ***          | ns  | *** |
|                                                                                                                                                                                     |                                                                                     |               |      |         |        | -P     | 12.04 ± 0.72b      | 1.45 ± 0.12d         | 11.64 ± 1.3b      |              |     |     |
|                                                                                                                                                                                     |                                                                                     |               |      |         | Leaves | +P     | 1 ± 0.16bc         | 0.67 ± 0.26c         | 1.74 ± 0.11a      | ***          | *** | ns  |
|                                                                                                                                                                                     |                                                                                     |               |      |         |        | -P     | 1.85 ± 0.37a       | 0.19 ± 0.31d         | 1.42 ± 0.17ab     |              |     |     |
|                                                                                                                                                                                     |                                                                                     |               |      |         | Roots  | +P     | 1 ± 0c             | 0.54 ± 0.15d         | 0.77 ± 0.23cd     | ***          | *** | *** |
|                                                                                                                                                                                     |                                                                                     |               |      |         |        | -P     | 3.51 ± 0.29a       | 1.71 ± 0.2b          | 1.41 ± 0.17b      |              |     |     |
| Prunin 6' P-coumarate                                                                                                                                                               |    | 580.1580764   | 2.97 | M-H2O-H | YS     | +P     | 1 ± 0.07c          | 0.63 ± 0.13d         | 1.74 ± 0.21a      | ***          | *** | *** |
|                                                                                                                                                                                     |                                                                                     |               |      |         |        | -P     | 1.32 ± 0.09b       | 0.39 ± 0.05e         | 0.8 ± 0.05cd      |              |     |     |
|                                                                                                                                                                                     |                                                                                     |               |      |         | Leaves | +P     | 1 ± 0.01a          | 0.5 ± 0.01b          | 0.18 ± 0.07d      | ***          | *** | *** |
|                                                                                                                                                                                     |                                                                                     |               |      |         |        | -P     | 0.06 ± 0.05e       | 0.01 ± 0.01e         | 0.3 ± 0.03c       |              |     |     |
|                                                                                                                                                                                     |                                                                                     |               |      |         | Roots  | +P     | 1 ± 0.02b          | 0.93 ± 0.08b         | 0.87 ± 0.23b      | ***          | *** | *** |
|                                                                                                                                                                                     |                                                                                     |               |      |         |        | -P     | 0.08 ± 0.08c       | 1.4 ± 0.14a          | 0.27 ± 0.01c      |              |     |     |
| Naringenin                                                                                                                                                                          |    | 272.068473494 | 5.05 | M-H     | YS     | +P     | 1 ± 0.22ab         | 1.39 ± 0.49a         | 1.44 ± 0.21a      | ***          | *** | *** |
|                                                                                                                                                                                     |                                                                                     |               |      |         |        | -P     | 1.36 ± 0.12a       | 0.02 ± 0c            | 0.78 ± 0.35b      |              |     |     |
|                                                                                                                                                                                     |                                                                                     |               |      |         | Leaves | +P     | 1 ± 0.06a          | 0.54 ± 0.02b         | 0.29 ± 0.02c      | ***          | *** | *** |
|                                                                                                                                                                                     |                                                                                     |               |      |         |        | -P     | 0.06 ± 0.04d       | 0.03 ± 0.05d         | 0.3 ± 0.03c       |              |     |     |
|                                                                                                                                                                                     |                                                                                     |               |      |         | Roots  | +P     | 1 ± 0.02b          | 1.68 ± 0.13a         | 0.8 ± 0.13c       | ***          | *** | *** |
|                                                                                                                                                                                     |                                                                                     |               |      |         |        | -P     | 0 ± 0d             | 0.69 ± 0.07c         | 0.8 ± 0.08c       |              |     |     |
| Eriodictyol                                                                                                                                                                         |  | 288.063388116 | 4.07 | M-H     | YS     | +P     | 1 ± 0.2d           | 1.27 ± 0.14c         | 2.63 ± 0.14a      | ***          | *** | *** |
|                                                                                                                                                                                     |                                                                                     |               |      |         |        | -P     | 2.04 ± 0.11b       | 0.04 ± 0.01e         | 0.9 ± 0.18d       |              |     |     |
|                                                                                                                                                                                     |                                                                                     |               |      |         | Leaves | +P     | 1 ± 0.04a          | 0.53 ± 0.01b         | 0.23 ± 0.03d      | ***          | *** | *** |
|                                                                                                                                                                                     |                                                                                     |               |      |         |        | -P     | 0.05 ± 0.05e       | 0.02 ± 0.03e         | 0.29 ± 0.03c      |              |     |     |
|                                                                                                                                                                                     |                                                                                     |               |      |         | Roots  | +P     | 1 ± 0.06b          | 1.44 ± 0.14a         | 0.71 ± 0.07c      | ***          | *** | *** |
|                                                                                                                                                                                     |                                                                                     |               |      |         |        | -P     | 0 ± 0e             | 0.38 ± 0.04d         | 0.66 ± 0.07c      |              |     |     |

Means with the different letter in the row of the same metabolites content are significantly different.  
 ‘\*\*\*’ 0.001 ‘\*\*’ 0.01 ‘\*’ 0.05 = significant differences, ns = non-significant differences, between light and P interaction.

Table S8. Targeted metabolites amino acid and catechins (mg g<sup>-1</sup>) in young shoots of tea plants in response light effect, P effect and their interaction effect.

| Metabolites        | P level | Light Intensity |               |               | Significance |             |             |
|--------------------|---------|-----------------|---------------|---------------|--------------|-------------|-------------|
|                    |         | FL              | ML            | LL            | light        | Plevel      | L×P         |
| <i>Amino Acids</i> |         |                 |               |               |              |             |             |
| Gly                | +P      | 0.28 ± 0.07c    | 0.23 ± 0.09c  | 0.69 ± 0.12b  | $p < 0.001$  | $p < 0.001$ | $p < 0.001$ |
|                    | -P      | 1.35 ± 0.24a    | 0.79 ± 0.13b  | 0.19 ± 0.16c  |              |             |             |
| Thr                | +P      | 0.56 ± 0.15c    | 1.68 ± 0.38a  | 0.47 ± 0.17c  | $p < 0.001$  | ns          | $p < 0.001$ |
|                    | -P      | 1.43 ± 0.21ab   | 1.3 ± 0.16b   | 0.39 ± 0.05c  |              |             |             |
| Ile                | +P      | 0.15 ± 0.02bc   | 0.64 ± 0.14a  | 0.22 ± 0.03b  | $p < 0.001$  | $p < 0.001$ | $p < 0.001$ |
|                    | -P      | 0.26 ± 0.15b    | 0.19 ± 0.01bc | 0.06 ± 0.02c  |              |             |             |
| Val                | +P      | 0.06 ± 0.01bc   | 0.62 ± 0.15a  | 0.13 ± 0.01bc | $p < 0.001$  | $p < 0.001$ | $p < 0.001$ |
|                    | -P      | 0.16 ± 0.04b    | 0.07 ± 0.01bc | 0.03 ± 0c     |              |             |             |
| Phe                | +P      | 0.2 ± 0.05c     | 1.38 ± 0.33a  | 0.61 ± 0.06b  | $p < 0.001$  | $p < 0.001$ | $p < 0.001$ |
|                    | -P      | 0.64 ± 0.06b    | 0.39 ± 0.05bc | 0.18 ± 0.05c  |              |             |             |
| Ala                | +P      | 0.09 ± 0a       | 0.02 ± 0.01d  | 0.06 ± 0.01bc | $p < 0.001$  | $p < 0.001$ | ns          |
|                    | -P      | 0.04 ± 0.01c    | 0.11 ± 0.01a  | 0.07 ± 0.01b  |              |             |             |
| Asp                | +P      | 2.59 ± 0.12b    | 0.74 ± 0.26d  | 1.3 ± 0.32c   | $p < 0.001$  | $p < 0.001$ | $p < 0.001$ |
|                    | -P      | 0.9 ± 0.09d     | 3.53 ± 0.2a   | 2.38 ± 0.25b  |              |             |             |
| Glu                | +P      | 2.32 ± 0.07b    | 3.36 ± 0.93a  | 2.25 ± 0.23b  | $p < 0.001$  | ns          | $p < 0.001$ |
|                    | -P      | 3.36 ± 0.21a    | 3.75 ± 0.4a   | 1.65 ± 0.16b  |              |             |             |
| Pro                | +P      | 1.25 ± 0.13e    | 7.68 ± 0.58a  | 2.33 ± 0.03d  | $p < 0.001$  | $p < 0.001$ | $p < 0.001$ |
|                    | -P      | 3.95 ± 0.41b    | 3.22 ± 0.61c  | 1.14 ± 0.33e  |              |             |             |

Continue on the next page

Table S8. Targeted metabolites amino acid and catechins (mg g<sup>-1</sup>) in young shoots of tea plants in response light effect, P effect and their interaction effect. (*cont.*).

| Metabolites      | P level | Light Intensity |               |               | Significance |             |             |
|------------------|---------|-----------------|---------------|---------------|--------------|-------------|-------------|
|                  |         | FL              | ML            | LL            | light        | Plevel      | L×P         |
| Cys              | +P      | 0.34 ± 0.04bc   | 0.11 ± 0.02d  | 0.25 ± 0.01c  | $p < 0.05$   | $p < 0.001$ | $p < 0.001$ |
|                  | -P      | 0.22 ± 0.01cd   | 0.59 ± 0.14a  | 0.41 ± 0.08b  |              |             |             |
| His              | +P      | 0.4 ± 0.08b     | 0.24 ± 0.05c  | 0.07 ± 0.03d  | $p < 0.001$  | $p < 0.001$ | $p < 0.01$  |
|                  | -P      | 0.59 ± 0.04a    | 0.52 ± 0.08ab | 0.49 ± 0.14ab |              |             |             |
| Leu              | +P      | 0.08 ± 0.01c    | 1.35 ± 0.22a  | 0.35 ± 0.08b  | $p < 0.001$  | $p < 0.001$ | $p < 0.001$ |
|                  | -P      | 0.5 ± 0.14b     | 0.08 ± 0.01c  | 0.05 ± 0.01c  |              |             |             |
| Lys              | +P      | 0.92 ± 0.17b    | 0.29 ± 0.05d  | 0.5 ± 0.14cd  | $p < 0.001$  | $p < 0.001$ | $p < 0.001$ |
|                  | -P      | 0.42 ± 0.03d    | 0.67 ± 0.03c  | 1.35 ± 0.22a  |              |             |             |
| Met              | +P      | 1.63 ± 0.08a    | 0.06 ± 0.02d  | 0.05 ± 0.01d  | $p < 0.001$  | $p < 0.001$ | $p < 0.001$ |
|                  | -P      | 0.13 ± 0.05cd   | 0.34 ± 0.24b  | 0.25 ± 0.06bc |              |             |             |
| Tyr              | +P      | 0.31 ± 0.05cd   | 1.43 ± 0.26a  | 0.63 ± 0.12b  | $p < 0.001$  | $p < 0.01$  | $p < 0.001$ |
|                  | -P      | 1.37 ± 0.12a    | 0.47 ± 0.03bc | 0.14 ± 0.05d  |              |             |             |
| <i>Catechins</i> |         |                 |               |               |              |             |             |
| CG               | +P      | 0.03 ± 0b       | 0.04 ± 0.01b  | 0.07 ± 0a     | $p < 0.001$  | $p < 0.001$ | ns          |
|                  | -P      | 0.08 ± 0.03a    | 0.03 ± 0b     | 0.04 ± 0b     |              |             |             |
| EC               | +P      | 0.71 ± 0.02b    | 0.69 ± 0.05b  | 0.64 ± 0.03c  | $p < 0.001$  | ns          | $p < 0.01$  |
|                  | -P      | 0.78 ± 0.02a    | 0.69 ± 0.02b  | 0.62 ± 0.01c  |              |             |             |
| ECG              | +P      | 2.28 ± 0.02c    | 2.74 ± 0.02b  | 2.17 ± 0.29c  | $p < 0.001$  | $p < 0.001$ | ns          |
|                  | -P      | 1.17 ± 0.01d    | 2.28 ± 0.45c  | 3.44 ± 0.26a  |              |             |             |

*Continue on the next page*



Table S8. Targeted metabolites amino acid and catechins (mg g<sup>-1</sup>) in young shoots of tea plants in response light effect, P effect and their interaction effect. (*cont.*).

| Metabolites | P level | Light Intensity |              |              | Significance |        |             |
|-------------|---------|-----------------|--------------|--------------|--------------|--------|-------------|
|             |         | FL              | ML           | LL           | light        | Plevel | L×P         |
| GA          | +P      | 0.65 ± 0.01a    | 0.54 ± 0.02c | 0.63 ± 0.01a | $p < 0.001$  | ns     | $p < 0.001$ |
|             | -P      | 0.64 ± 0a       | 0.63 ± 0.01a | 0.56 ± 0.01b |              |        |             |
| GC          | +P      | 0.15 ± 0.01a    | 0.15 ± 0.01a | 0.15 ± 0.07a | ns           | ns     | ns          |
|             | -P      | 0.15 ± 0.03a    | 0.15 ± 0.04a | 0.15 ± 0.04a |              |        |             |
| GCG         | +P      | 0.26 ± 0.02a    | 0.26 ± 0.03a | 0.26 ± 0.04a | ns           | ns     | ns          |
|             | -P      | 0.3 ± 0.01a     | 0.27 ± 0.06a | 0.26 ± 0.02a |              |        |             |

Table S9. Targeted metabolites amino acid and catechins (mg g<sup>-1</sup>) in leaves of tea plants in response light effect, P effect and their interaction effect.

| Metabolites        | P level | Light Intensity |               |               | Significance |             |             |
|--------------------|---------|-----------------|---------------|---------------|--------------|-------------|-------------|
|                    |         | FL              | ML            | LL            | light        | Plevel      | L×P         |
| <i>Amino Acids</i> |         |                 |               |               |              |             |             |
| Ser                | +P      | 0.05 ± 0.01d    | 0.13 ± 0.01a  | 0.07 ± 0c     | $p < 0.001$  | $p < 0.001$ | $p < 0.001$ |
|                    | -P      | 0.09 ± 0.01b    | 0.06 ± 0.01c  | 0.13 ± 0.01a  |              |             |             |
| Gly                | +P      | 0.38 ± 0.15b    | 0.1 ± 0.03c   | 0.16 ± 0.04c  | $p < 0.001$  | $p < 0.001$ | ns          |
|                    | -P      | 0.16 ± 0.02c    | 0.57 ± 0.17a  | 0.35 ± 0.02b  |              |             |             |
| Thr                | +P      | 0.33 ± 0.11c    | 0.12 ± 0.05de | 0.23 ± 0.02cd | $p < 0.001$  | $p < 0.001$ | $p < 0.001$ |
|                    | -P      | 1.35 ± 0.03a    | 0.64 ± 0.15b  | 0.08 ± 0.02e  |              |             |             |
| Ile                | +P      | 0.67 ± 0.1a     | 0.28 ± 0.01b  | 0.08 ± 0.01c  | $p < 0.001$  | $p < 0.001$ | $p < 0.001$ |
|                    | -P      | 0.16 ± 0.11c    | 0.09 ± 0c     | 0.19 ± 0.05bc |              |             |             |
| Val                | +P      | 0.31 ± 0.02a    | 0.08 ± 0.01c  | 0.2 ± 0.02b   | $p < 0.001$  | $p < 0.001$ | $p < 0.001$ |
|                    | -P      | 0.04 ± 0.02d    | 0.03 ± 0.01d  | 0.06 ± 0.03cd |              |             |             |
| Phe                | +P      | 1.64 ± 0.06a    | 0.85 ± 0.01b  | 0.66 ± 0.12c  | $p < 0.001$  | $p < 0.001$ | $p < 0.001$ |
|                    | -P      | 0.68 ± 0.05c    | 0.32 ± 0.01d  | 0.05 ± 0.02e  |              |             |             |
| Ala                | +P      | 0.03 ± 0.01bc   | 0.01 ± 0cd    | 0.01 ± 0d     | $p < 0.001$  | $p < 0.001$ | ns          |
|                    | -P      | 0.07 ± 0.01a    | 0.06 ± 0.02a  | 0.04 ± 0.02b  |              |             |             |
| Asp                | +P      | 0.26 ± 0.06c    | 0.63 ± 0.02a  | 0.21 ± 0.02c  | $p < 0.01$   | $p < 0.05$  | $p < 0.001$ |
|                    | -P      | 0.58 ± 0.07a    | 0.23 ± 0.04c  | 0.45 ± 0.12b  |              |             |             |
| Glu                | +P      | 1.68 ± 0.02c    | 1.81 ± 0.16c  | 1.7 ± 0.12c   | $p < 0.001$  | $p < 0.001$ | $p < 0.001$ |
|                    | -P      | 2.34 ± 0.22b    | 3.47 ± 0.2a   | 2.44 ± 0.24b  |              |             |             |

*Continue on the next page*

Table S9. Targeted metabolites amino acid and catechins (mg g<sup>-1</sup>) in leaves of tea plants in response light effect, P effect and their interaction effect. (*cont.*).

| Metabolites | P level | Light Intensity |               |                | Significance |             |             |
|-------------|---------|-----------------|---------------|----------------|--------------|-------------|-------------|
|             |         | FL              | ML            | LL             | light        | Plevel      | L×P         |
| Pro         | +P      | 2.63 ± 0.16b    | 2 ± 0.11bc    | 8.35 ± 1.74a   | $p < 0.001$  | $p < 0.001$ | $p < 0.001$ |
|             | -P      | 0.72 ± 0.26cd   | 0.32 ± 0.09d  | 2.57 ± 0.55b   |              |             |             |
| Arg         | +P      | 2.35 ± 0.29b    | 0.25 ± 0.1d   | 0.76 ± 0.04c   | $p < 0.001$  | $p < 0.001$ | $p < 0.001$ |
|             | -P      | 0.53 ± 0.13cd   | 4.91 ± 0.47a  | 0.42 ± 0.13cd  |              |             |             |
| Cys         | +P      | 0.28 ± 0.06a    | 0.32 ± 0.04a  | 0.13 ± 0.02b   | $p < 0.001$  | $p < 0.001$ | $p < 0.001$ |
|             | -P      | 0.07 ± 0.02c    | 0.04 ± 0.01c  | 0.05 ± 0.01c   |              |             |             |
| His         | +P      | 0.07 ± 0.01c    | 0.11 ± 0.03c  | 0.09 ± 0c      | $p < 0.001$  | $p < 0.001$ | $p < 0.001$ |
|             | -P      | 0.25 ± 0.08b    | 0.38 ± 0.09a  | 0.07 ± 0.01c   |              |             |             |
| Leu         | +P      | 0.12 ± 0.02b    | 0.19 ± 0.02a  | 0.25 ± 0.03a   | $p < 0.01$   | $p < 0.001$ | ns          |
|             | -P      | 0.24 ± 0.08a    | 0.12 ± 0.01b  | 0.07 ± 0.01b   |              |             |             |
| Lys         | +P      | 0.64 ± 0.04b    | 0.26 ± 0.08d  | 0.69 ± 0.07b   | $p < 0.001$  | $p < 0.001$ | $p < 0.001$ |
|             | -P      | 0.44 ± 0.06c    | 1.24 ± 0.16a  | 0.32 ± 0.09cd  |              |             |             |
| Met         | +P      | 1.08 ± 0.1a     | 0.07 ± 0.01c  | 0.64 ± 0.11b   | $p < 0.001$  | $p < 0.001$ | $p < 0.001$ |
|             | -P      | 0.09 ± 0.02c    | 0.68 ± 0.08b  | 0.06 ± 0.01c   |              |             |             |
| Thea        | +P      | 22.87 ± 1.03a   | 11.18 ± 0.57d | 13.1 ± 1.37cd  | $p < 0.001$  | $p < 0.001$ | ns          |
|             | -P      | 16.57 ± 0.41b   | 16.86 ± 2.19b | 15.13 ± 0.45bc |              |             |             |
| Tyr         | +P      | 0.75 ± 0.07b    | 0.54 ± 0.27b  | 0.1 ± 0.03c    | $p < 0.001$  | $p < 0.001$ | $p < 0.001$ |
|             | -P      | 0.48 ± 0.03b    | 1.47 ± 0.44a  | 0.5 ± 0.03b    |              |             |             |

*Continue on the next page*

Table S9. Targeted metabolites amino acid and catechins (mg g<sup>-1</sup>) in leaves of tea plants in response light effect, P effect and their interaction effect. (*cont.*).

| Metabolites      | P level | Light Intensity |               |               | Significance |             |             |
|------------------|---------|-----------------|---------------|---------------|--------------|-------------|-------------|
|                  |         | FL              | ML            | LL            | light        | Plevel      | L×P         |
| <i>Catechins</i> |         |                 |               |               |              |             |             |
| EGCG             | +P      | 34.38 ± 1.04a   | 14.79 ± 0.45e | 15.37 ± 0.47e | $p < 0.001$  | $p < 0.001$ | $p < 0.001$ |
|                  | -P      | 31.91 ± 0.25b   | 20.59 ± 0.16d | 24.58 ± 0.19c |              |             |             |
| C                | +P      | 0.09 ± 0.01b    | 0.11 ± 0.01a  | 0.12 ± 0.02a  | $p < 0.001$  | ns          | ns          |
|                  | -P      | 0.1 ± 0.01ab    | 0.12 ± 0.01a  | 0.11 ± 0.01ab |              |             |             |
| CG               | +P      | 0.05 ± 0.03a    | 0.03 ± 0.01ab | 0.03 ± 0ab    | $p < 0.001$  | ns          | ns          |
|                  | -P      | 0.04 ± 0a       | 0.02 ± 0.01b  | 0.03 ± 0.01ab |              |             |             |
| EC               | +P      | 0.16 ± 0.01a    | 0.16 ± 0.01a  | 0.16 ± 0.01a  | ns           | ns          | ns          |
|                  | -P      | 0.16 ± 0.01a    | 0.15 ± 0.01a  | 0.16 ± 0a     |              |             |             |
| ECG              | +P      | 2.48 ± 0.41a    | 1.53 ± 0.25b  | 0.92 ± 0.15c  | $p < 0.001$  | $p < 0.001$ | ns          |
|                  | -P      | 1.92 ± 0.38b    | 0.77 ± 0.15c  | 0.57 ± 0.12c  |              |             |             |
| EGC              | +P      | 0.09 ± 0.01b    | 3.11 ± 0.99a  | 2.22 ± 0.71a  | $p < 0.001$  | $p < 0.05$  | $p < 0.01$  |
|                  | -P      | 0.1 ± 0.01b     | 2.98 ± 0.7a   | 0.77 ± 0.18b  |              |             |             |
| GA               | +P      | 0.32 ± 0.01a    | 0.32 ± 0.01a  | 0.32 ± 0.01a  | ns           | ns          | ns          |
|                  | -P      | 0.32 ± 0a       | 0.32 ± 0a     | 0.32 ± 0a     |              |             |             |
| GC               | +P      | 0.07 ± 0.03a    | 0.08 ± 0.04a  | 0.08 ± 0.04a  | ns           | ns          | ns          |
|                  | -P      | 0.07 ± 0.02a    | 0.05 ± 0.01a  | 0.08 ± 0.02a  |              |             |             |
| GCG              | +P      | 0.02 ± 0.01a    | 0.02 ± 0.01a  | 0.02 ± 0.01a  | ns           | ns          | ns          |
|                  | -P      | 0.02 ± 0.01a    | 0.02 ± 0a     | 0.02 ± 0a     |              |             |             |

Table S10. Correlation between pathways with phosphorus and biomass due to P effect.

|                                                            | P levels | Phosphorus |          | Biomass |         |
|------------------------------------------------------------|----------|------------|----------|---------|---------|
|                                                            |          | +P         | -P       | +P      | -P      |
| Phosphorus                                                 | +P       |            | 0.99***  | 0.7**   | 0.5*    |
|                                                            | -P       | 0.99***    |          | 0.73*** | 0.5*    |
| Anthocyanidin and Anthocyanin Biosynthesis                 | +P       | 0.95***    | 0.93***  | 0.59**  | 0.58*   |
|                                                            | -P       | 0.89***    | 0.9***   | 0.69**  | 0.44ns  |
| <i>AAP (amino acid permeases)</i>                          | +P       | -0.17ns    | -0.23ns  | -0.39ns | 0.08ns  |
|                                                            | -P       | 0.67**     | 0.61**   | 0.28ns  | 0.49*   |
| Isofavone Biosynthesis                                     | +P       | -0.61**    | -0.57*   | -0.16ns | -0.53*  |
|                                                            | -P       | -0.47*     | -0.42ns  | -0.07ns | -0.42ns |
| <i>GSTb (glutathione S-transferase b)</i>                  | +P       | -0.7**     | -0.66**  | -0.28ns | -0.53*  |
|                                                            | -P       | -0.76***   | -0.72*** | -0.34ns | -0.54*  |
| Phe, Tyr and Trp biosynthesis                              | +P       | 0.01ns     | 0.06ns   | 0.38ns  | -0.2ns  |
|                                                            | -P       | -0.45ns    | -0.4ns   | -0.03ns | -0.4ns  |
| <i>SWEET3 (bidirectional sugar transporter)</i>            | +P       | -0.26ns    | -0.3ns   | -0.32ns | -0.31ns |
|                                                            | -P       | -0.86***   | -0.82*** | -0.49*  | -0.67** |
| Alanine, Asparate and Glutamate Metabolism                 | +P       | -0.57*     | -0.52*   | -0.13ns | -0.47ns |
|                                                            | -P       | -0.06ns    | 0ns      | 0.33ns  | -0.25ns |
| <i>SPX2 (Pi transport, stress, sensing and signalling)</i> | +P       | 0.43ns     | 0.46ns   | 0.72*** | 0.07ns  |
|                                                            | -P       | -0.74***   | -0.71*** | -0.25ns | -0.62** |

*Continue on the next page*

Table S10. Correlation between pathways with phosphorus and biomass due to P effect.

|                               | P levels | Phosphorus |         | Biomass |         |
|-------------------------------|----------|------------|---------|---------|---------|
|                               |          | +P         | -P      | +P      | -P      |
| Pentose phosphate pathway     | +P       | -0.41ns    | -0.35ns | 0.02ns  | -0.41ns |
|                               | -P       | -0.31ns    | -0.25ns | 0.06ns  | -0.39ns |
| Biomass                       | +P       | 0.7**      | 0.73*** |         | 0.38ns  |
|                               | -P       | 0.5*       | 0.5*    | 0.38ns  |         |
| Inositol phosphate metabolism | +P       | 0.65**     | 0.61**  | 0.23ns  | 0.5*    |
|                               | -P       | -0.15ns    | -0.09ns | 0.18ns  | -0.33ns |

Means with the different letter in the row of the same metabolites content are significantly different.

‘\*\*\*’ 0.001 ‘\*\*’ 0.01 ‘\*’ 0.05 = significant differences, ns = non-significant differences, between light and P interaction.

Table S11. Correlation between pathways with phosphorus and biomass under different light regimes.

|                                                 | Light levels | Phosphorus |          |          | Biomass  |          |          |
|-------------------------------------------------|--------------|------------|----------|----------|----------|----------|----------|
|                                                 |              | FL         | ML       | LL       | FL       | ML       | LL       |
| Phosphorus                                      | FL           |            | 0.96***  | 0.94***  | 0.97***  | 0.89***  | 0.84***  |
|                                                 | ML           | 0.96***    |          | 0.96***  | 0.93***  | 0.87***  | 0.8**    |
|                                                 | LL           | 0.94***    | 0.96***  |          | 0.94***  | 0.93***  | 0.8**    |
| Anthocyanidin and Anthocyanin Biosynthesis      | FL           | 0.96***    | 0.98***  | 0.96***  | 0.95***  | 0.93***  | 0.85***  |
|                                                 | ML           | -0.98***   | -0.97*** | -0.97*** | -0.96*** | -0.92*** | -0.83*** |
|                                                 | LL           | -0.98***   | -0.96*** | -0.95*** | -0.97*** | -0.94*** | -0.85*** |
| <i>AAP (amino acid permeases)</i>               | FL           | -0.98***   | -0.96*** | -0.95*** | -0.96*** | -0.92*** | -0.85*** |
|                                                 | ML           | -0.98***   | -0.95*** | -0.93*** | -0.94*** | -0.91*** | -0.84*** |
|                                                 | LL           | -0.96***   | -0.94*** | -0.98*** | -0.96*** | -0.93*** | -0.84*** |
| Isofavone Biosynthesis                          | FL           | -0.94***   | -0.94*** | -0.88*** | -0.9***  | -0.87*** | -0.76**  |
|                                                 | ML           | -0.75**    | -0.69*   | -0.65*   | -0.7*    | -0.65*   | -0.58*   |
|                                                 | LL           | -0.35ns    | -0.35ns  | -0.33ns  | -0.32ns  | -0.51ns  | -0.42ns  |
| <i>GSTb (glutathione S-transferase b)</i>       | FL           | -0.58ns    | -0.44ns  | -0.55ns  | -0.56ns  | -0.65*   | -0.65*   |
|                                                 | ML           | -0.89***   | -0.87*** | -0.89*** | -0.83*** | -0.92*** | -0.76**  |
|                                                 | LL           | -0.91***   | -0.92*** | -0.86*** | -0.9***  | -0.84*** | -0.74**  |
| Phe, Tyr and Trp biosynthesis                   | FL           | -0.7*      | -0.53ns  | -0.57ns  | -0.69*   | -0.71**  | -0.68*   |
|                                                 | ML           | -0.95***   | -0.88*** | -0.85*** | -0.89*** | -0.79**  | -0.78**  |
|                                                 | LL           | -0.97***   | -0.96*** | -0.93*** | -0.92*** | -0.9***  | -0.8**   |
| <i>SWEET3 (bidirectional sugar transporter)</i> | FL           | -0.92***   | -0.94*** | -0.88*** | -0.89*** | -0.82**  | -0.78**  |
|                                                 | ML           | -0.95***   | -0.89*** | -0.92*** | -0.93*** | -0.93*** | -0.88*** |
|                                                 | LL           | -0.98***   | -0.96*** | -0.93*** | -0.95*** | -0.92*** | -0.83*** |

Continue on the next page

Table S11. Correlation between pathways with phosphorus and biomass under different light regimes.

|                                                            | Light levels | Phosphorus |          |          | Biomass  |          |          |
|------------------------------------------------------------|--------------|------------|----------|----------|----------|----------|----------|
|                                                            |              | FL         | ML       | LL       | FL       | ML       | LL       |
| Alanine, Asparate and Glutamate Metabolism                 | FL           | 0.34ns     | 0.5ns    | 0.54ns   | 0.35ns   | 0.48ns   | 0.26ns   |
|                                                            | ML           | 0.97***    | 0.97***  | 0.97***  | 0.96***  | 0.92***  | 0.82**   |
|                                                            | LL           | 0.97***    | 0.97***  | 0.94***  | 0.94***  | 0.91***  | 0.82**   |
| <i>SPX2 (Pi transport, stress, sensing and signalling)</i> | FL           | -0.96***   | -0.91*** | -0.95*** | -0.94*** | -0.96*** | -0.87*** |
|                                                            | ML           | -0.98***   | -0.93*** | -0.94*** | -0.95*** | -0.91*** | -0.85*** |
|                                                            | LL           | -0.98***   | -0.93*** | -0.92*** | -0.94*** | -0.92*** | -0.84*** |
| Pentose phosphate pathway                                  | FL           | 0.97***    | 0.94***  | 0.95***  | 0.97***  | 0.92***  | 0.87***  |
|                                                            | ML           | 0.95***    | 0.93***  | 0.88***  | 0.89***  | 0.86***  | 0.79**   |
|                                                            | LL           | 0.96***    | 0.96***  | 0.95***  | 0.94***  | 0.94***  | 0.83***  |
| Biomass                                                    | FL           | 0.97***    | 0.93***  | 0.94***  |          | 0.92***  | 0.9***   |
|                                                            | ML           | 0.89***    | 0.87***  | 0.93***  | 0.92***  |          | 0.87***  |
|                                                            | LL           | 0.84***    | 0.8**    | 0.8**    | 0.9***   | 0.87***  |          |
| Inositol phosphate metabolism                              | FL           | -0.62*     | -0.61*   | -0.6*    | -0.52ns  | -0.49ns  | -0.27ns  |
|                                                            | ML           | -0.96***   | -0.94*** | -0.97*** | -0.97*** | -0.95*** | -0.85*** |
|                                                            | LL           | -0.86***   | -0.79**  | -0.87*** | -0.88*** | -0.91*** | -0.77**  |

Means with the different letter in the row of the same metabolites content are significantly different.

‘\*\*\*’ 0.001 ‘\*\*’ 0.01 ‘\*’ 0.05 = significant differences, ns = non-significant differences, between light and P interaction.
